# Conservation of the direct and indirect pathways dichotomy in mouse caudal striatum with uneven distribution of dopamine receptor D1- and D2-expressing neurons

1 Kumiko Ogata<sup>1</sup>, Fuko Kadono<sup>2</sup>, Yasuharu Hirai<sup>1,2</sup>, Ken-ichi Inoue<sup>3</sup>, Masahiko Takada<sup>3</sup>,  
2 Fuyuki Karube<sup>1,2</sup> †, and Fumino Fujiyama<sup>1,2</sup> †

3 <sup>1</sup>Laboratory of Neural Circuitry, Graduate School of Brain Science, Doshisha University,  
4 Kyotanabe 610-0394, Japan

5 <sup>2</sup>Laboratory of Histology and Cytology, Faculty of Medicine and Graduate School of Medicine,  
6 Hokkaido University, Sapporo 060-8638, Japan

7 <sup>3</sup>Systems Neuroscience Section, Primate Research Institute, Kyoto University, Inuyama, Aichi 484-  
8 8506, Japan

9 † These authors share senior and last authorship.

## 10 \* Correspondence:

11 Prof. Fumino Fujiyama and Fuyuki Karube

12 fujiyama@pop.med.hokudai.ac.jp and karube@med.hokudai.ac.jp

13 **Keywords: striatum; substantia nigra pars lateralis; dopamine receptor; tyrosine**  
14 **hydroxylase; basal ganglia; direct pathway; indirect pathway**

## 15 Abstract

16 The striatum is one of the key nuclei for adequate control of voluntary behaviors and reinforcement  
17 learning. Two striatal projection neuron types, expressing either dopamine receptor D1 (D1R) or  
18 dopamine receptor D2 (D2R) constitute two independent output routes: the direct or indirect  
19 pathways, respectively. These pathways co-work in balance to achieve coordinated behavior. Two  
20 projection neuron types are equivalently intermingled in most striatal space. However, recent  
21 studies revealed two atypical zones in the caudal striatum: the zone in which D1R-neurons are the  
22 minor population (D1R-poor zone) and that in which D2R-neurons are the minority (D2R-poor  
23 zone). It remains obscure as to whether these imbalanced zones have similar properties on axonal  
24 projections and electrophysiology to other striatal regions. Based on morphological experiments in  
25 mice using immunofluorescence, *in situ* hybridization, and neural tracing, here, we revealed the  
26 poor zones densely projected to the globus pallidus and substantia nigra pars lateralis, with a few  
27 collaterals in substantia nigra pars reticulata and compacta. As other striatal regions, D1R-neurons  
28 were the direct pathway neurons, while projection neurons in the poor zones possessed similar  
29 electrophysiological membrane properties to those in the conventional striatum using *in vitro*  
30 electrophysiological recording. In addition, the poor zones existed irrespective of the age of mice.  
31 We also identified the poor zones in the common marmoset as well as other rodents. These results  
32 suggest that the poor zones in the caudal striatum follow the conventional projection patterns  
33 irrespective of imbalanced distribution of projection neurons. The poor zones could be an innate  
34 structure and common in mammals and relate to specific functions via highly restricted projections.

35

## Striatonigral output of caudal striatal neurons

### 36 1 Introduction

37 The striatum regulates voluntary movement and reward-related learning by integrating excitatory  
38 inputs from the cerebral cortex and thalamus (Alexander et al., 1986; Hikosaka et al., 2000; Kreitzer  
39 and Malenka, 2008; Peak et al., 2019; Redgrave et al., 2011). The medium spiny projection neurons  
40 (MSNs), the major population of striatal neurons, are classified into two groups, direct and indirect  
41 pathway neurons, depending on their projection targets and gene expression. The direct pathway  
42 MSNs (dMSNs) transmit information to output nuclei, such as entopeduncular nucleus (EP) and  
43 substantia nigra (SN), directly. The dMSNs express GABA, dopamine receptor D1 (D1R), and  
44 substance P. In contrast, indirect pathway MSNs express GABA, dopamine receptor D2 (D2R), and  
45 enkephalin and indirectly project to the output nuclei via the globus pallidus (GP) and subthalamic  
46 nucleus (Albin et al., 1989; Alexander and Crutcher 1990; Graybiel, 1990). It has long been  
47 believed that both types of projection neurons are randomly distributed (Gerfen, 1989; Lança et al.,  
48 1986; Tinterri et al., 2018), and each local striatal area contains an almost equal proportion of both  
49 types (Hedreen and DeLong, 1991; Selemon and Goldman-Rakic, 1990).

50 Dense and topographic corticostriatal innervation recruits striatal subregions for specific functions  
51 (Nambu, 2008; Shepherd, 2013; Shipp, 2016). The caudal striatum (cStr) in rodents lies under the  
52 temporal cortical area and is similar to the caudate tail (CDt) in primates, which is a curved long  
53 extension of the ventral part of the caudate nucleus. Temporal areas, including somatosensory,  
54 visual, and auditory related areas, innervate cStr in rodents (Deniau et al., 1996; Hintiryan et al.,  
55 2016; Hunnicutt et al., 2016; Jiang and Kim, 2018; Xiong et al., 2015) and CDt in primates (Brown  
56 et al., 1995; Caan et al., 1984; Saint-Cyr et al., 1990; Yeterian and Pandya, 1998; Yeterian and Van  
57 Hoesen, 1978); therefore, they are considered the sensory striatum. In addition, similar to cStr in  
58 rodents (Menegas et al., 2015; Watabe-Uchida et al., 2012), CDt in primates receives the projection  
59 from a specific group of dopaminergic neurons (Kim et al., 2014; Kim and Hikosaka, 2013). Thus,  
60 cStr in rodents and CDt in primates share common neural connection features. The functional  
61 significance of CDt and cStr has been also gradually uncovered. CDt in primates is involved in the  
62 distinct functions such as coding value of objects (Griggs et al., 2017; Kim et al., 2017; Kim et al.,  
63 2014; Kim and Hikosaka, 2013). Recent studies in rodents have shown that the cStr is involved in  
64 the avoidance behavior of mice (Menegas et al., 2018; Menegas et al., 2017).

65 Gangarossa et al. (2013) revealed a unique cStr region adjacent to GP using BAC transgenic mice  
66 that express eGFP. The region is surprisingly composed almost exclusively of *Drd1a* expressing  
67 neurons and is therefore called D2R/A2aR-expressing MSNs-poor zone (Gangarossa et al., 2013).  
68 Studies with transgenic mice showed the difference in the proportion of D1R and D2R-expressing  
69 neurons in the cStr (Miyamoto et al., 2018; Miyamoto et al., 2019; for review, see Valjent and  
70 Gangarossa, 2021). Our previous study with wild-type mice also confirmed the highly uneven  
71 distribution of D1R and D2R immunoreaction in the unique regions of cStr (Ogata et al., 2018).

72

73 Although such uneven distribution of D1R and D2R immunoreactivity conjures up the possibility  
74 that the direct and indirect pathway neurons are separately distributed in these regions of cStr, it  
75 contradicts the conservative model according to which the physiological function requires a balance  
76 of the direct and indirect pathway neurons mediated by D1R and D2R, respectively (Calabresi et al.,  
77 2014; Cui et al., 2013; Friend and Kravitz, 2014; Isomura et al., 2013). Thus, we raise two  
78 questions: First, does the uneven distribution of D1R and D2R immunoreactions actually reflect  
79 separate distribution of the direct and indirect pathway projection neurons? If so, what are neural

80 circuitries driven by? Second, is this uneven distribution a common property of the sensory related  
81 striatum and conserved among rodents and primates, or a rodent-specific feature (Gangarossa et al.,  
82 2019)? If the former, sensory inputs may modify the uneven structure of the sensory related  
83 striatum. Thus, the uneven structure may vary developmentally, since neonatal mice do not respond  
84 to visual and auditory stimuli (Huberman et al., 2008; Sonntag et al., 2009), while aged C57BL6  
85 mice typically have impaired hearing (Zheng et al., 1999). Alternatively, the uneven structure of the  
86 cStr can be innate, although maturation of MSNs continues in the early postnatal days (Krajeski et  
87 al., 2019). To address these questions, we employed a combination of *in situ* hybridization,  
88 immunohistochemistry, electrophysiological recording, and retrograde/anterograde tracing in mice,  
89 and compared the cStr across ages and species.

## 90 **2 Materials and Methods**

91 All animal experiments in the mice and rats were approved and performed in accordance with the  
92 guidelines for the care and use of laboratory animals established by the Committee for Animal Care  
93 and Use of Doshisha University (Approval number: A16008, A17001, A18001, A19036, and  
94 A20057) and the Animal Care and Use Committee of Hokkaido University (Approval Number: 20-  
95 0106). All animal studies in the common marmoset were conducted in accordance with  
96 experimental procedure protocols approved by the Animal Welfare and Animal Care Committee of  
97 the Primate Research Institute of Kyoto University (Approval number: 2017-031). All efforts were  
98 made to minimize animal suffering and the number of animals used. Chemicals were purchased  
99 from Nacalai Tesque (Kyoto, Japan) and Wako (Osaka, Japan), unless otherwise noted.

100 In this study, 42-wild type C57BL/6J male mice (8-day-old–172-week-old), three wild type slc:ICR  
101 male mice (11 weeks old), three Long-Evans male rats (11–13 week old), three Wistar male rats  
102 (12-week-old), and two common marmosets (a 6-year-old male and a 5-year-old female) were used.

103

### 104 **2.1 Animal surgery: Retro- and anterograde tracing study**

105 Mice were anesthetized by inhalation of isoflurane (Pfizer Japan Inc., Tokyo, Japan) followed by  
106 intramuscular injection of a mixture of ketamine (Ketalar; Daiichi-Sankyo, Tokyo, Japan; 40  
107 mg/kg) and xylazine (Bayer HealthCare, Tokyo, Japan; 4 mg/kg). Before and after surgery,  
108 butorphanol solution (Meiji Seika Pharma Co Ltd, Tokyo, Japan) was injected subcutaneously (0.2  
109 mg/kg) for analgesia. Each mouse was then fixed to a stereotaxic device (Narishige, Tokyo, Japan).  
110 During surgery, the body temperature of the mice was monitored and maintained at approximately  
111 38°C (BWT 100A animal warmer, Bio Research Center, Nagoya, Japan). The skull was drilled to  
112 make a small hole in an appropriate position in accordance with the mouse brain atlas (Paxinos and  
113 Franklin, 2013). For retrograde tracing combined with *in situ* hybridization, a large volume (> 0.5  
114 µL) of 0.2% cholera toxin subunit B – Alexa Fluor 555 (CTB555) or 488 (CTB488) conjugate  
115 (C22843 or C-22841, Thermo fisher Scientific, Inc.) in 0.1 M phosphate buffer (PB, pH 7.4) was  
116 injected around the output nuclei of the basal ganglia of 3 mice [anteroposterior (AP): 2.8 mm  
117 caudal from the bregma (AP -2.8), lateromedial (LM): 2.1 mm lateral from the midline (L 2.1),  
118 depth: 3.7–4.2 mm from the pial surface (D 3.7–4.2)] using a glass pipette (tip diameter, 15–20 µm)  
119 through which air pressure pulses were delivered with a pressure injector (PV820, World Precision  
120 Instruments, Sarasota, FL, USA). The site of injection extended to the substantia nigra pars  
121 reticulata (SNr), substantia nigra pars compacta (SNpc), and entopeduncular nucleus (EP), but did  
122 not reach the GP. For retrograde tracing from substantia nigra pars lateralis (SNpl) or medial

## Striatonigral output of caudal striatal neurons

123 geniculate nucleus (MG), 0.2% CTB555 (~0.2  $\mu$ l) was injected by pressure, or 5% fluorogold (FG)  
124 solved in phosphate-buffered saline (PBS) was injected iontophoretically (0.8–1.0  $\mu$ A positive  
125 current pulses with a 7 s-on/off cycle for 5 min using A365, World Precision Instruments). The  
126 coordinates of the injection were [AP -2.9, L 1.8, D 3.8] for SNpl and [AP -3.2, L 2.0, D 2.8] for  
127 MG (N = 3 mice for each).

128 For anterograde tracing, 10% biotinylated dextran amine (BDA; D1956, Invitrogen) in phosphate-  
129 buffered saline (PBS, pH 7.4) or 2.5% Phaseolus Vulgaris Leucoagglutinin (PHAL; L-1110, Vector  
130 laboratories) in 10 mM phosphate (pH 8.0) was injected in the cStr using a glass pipette (tip  
131 diameter, 15–25  $\mu$ m). The BDA solution was injected iontophoretically by a 1.2  $\mu$ A current pulses  
132 with a 7 s-on/off cycle for 5–20 min, or ejected by a single air pulse. PHAL was injected by 4  $\mu$ A  
133 current pulses with a 7 s on/off cycle for 5 min. After 3–5 days, each mouse was perfused as  
134 described below. The targeted coordinates for cdStr were [AP -1.2, L 2.7, D 1.7], and those for  
135 D1R- and/or D2R-poor zones were [AP -1.2, L 2.7, D 2.8].

136

## 137 **2.2 Immunofluorescence labeling and tracer visualization**

### 138 **2.2.1 Tissue preparation**

139 Mice and rats were deeply anesthetized with isoflurane and sodium pentobarbital (100 mg/kg, i.p.;  
140 Kyoritsu Seiyaku Corporation, Tokyo, Japan). The animals were then transcardially perfused with  
141 8.5% sucrose in 20 mM PB containing 5 mM  $MgCl_2$ , followed by 4% w/v paraformaldehyde and  
142 75% saturated picric acid in 0.1 M PB. After perfusion pump off, the brain was postfixed *in situ* for  
143 1.5 h at room temperature (RT;  $25 \pm 3^\circ$ ), and then the brain was removed from the skull followed  
144 by cryoprotection with 30% sucrose in PBS for 24–48h at  $4^\circ$ . Tissue blocks containing the striatum  
145 were sectioned sagittally or coronally using a freezing microtome (Leica Microsystems, Wetzlar,  
146 Germany) at a thickness of 20  $\mu$ m. Six series of floating sections were collected in 0.1 M PB  
147 containing 0.02% of sodium azide and prepared for immunofluorescence labeling.

148 Two common marmosets (*Callithrix jacchus*; one male and one female) weighing around 370 g  
149 were used for this study. They were caged at  $27 \pm 2^\circ$  C in  $50 \pm 10\%$  humidity with a 12-h light–dark  
150 cycle and were fed twice a day with a standard marmoset diet supplemented with fruit, mealworm,  
151 and gum with vitamin D. Water was available ad libitum. Following sedation with ketamine  
152 hydrochloride (40 mg/kg, i.m.), the marmosets were deeply anesthetized with an overdose of  
153 sodium pentobarbital (50 mg/kg, i.v.) for perfusion-fixation. The marmosets were transcardially  
154 perfused with 0.1 M PBS (pH 7.4) followed by 4% paraformaldehyde in 0.1 M PB (pH 7.4). The  
155 brain was removed from the skull, postfixed in the same fresh fixative overnight, and saturated with  
156 30% sucrose in PB at  $4^\circ$ C. Tissue blocks containing the putamen and caudate nucleus were  
157 sectioned coronally using a freezing microtome at a thickness of 25  $\mu$ m. Twelve series of floating  
158 sections were collected in 0.1 M PB containing 0.02% of sodium azide and prepared for  
159 immunofluorescence labeling.

160

### 161 **2.2.2 Immunofluorescence labeling**

162 The sections of mice, rats, and marmosets were incubated with a mixture of primary antibodies  
163 overnight at RT (Table 1). The primary antibodies were diluted with incubation buffer containing  
164 10% (v/v) normal donkey serum (Merck KGaA, Darmstadt, Germany), 2% bovine serum albumin  
165 and 0.5% (v/v) Triton X-100 in 0.05 M Tris-buffered saline (TBS). After exposure to the primary  
166 antibodies, the sections were washed in TBS and incubated for 3 h at RT in the same buffer  
167 containing a mixture of secondary antibodies (Table 2). In some cases, the whole immunoreaction  
168 steps were repeated to enhance signals. After rinsing, the sections were mounted on to glass slides,  
169 air dried, and cover-slipped with 50% (v/v) glycerol/TBS.

### 170 **2.2.3 Tracer visualization**

171 BDA was visualized with fluorophore-conjugated streptavidin (Thermo Fisher Scientific; 1:1,000 for  
172 3 h) combined with a tyramine signal amplification method. PHAL was detected using  
173 immunofluorescence.

174

### 175 **2.3 *In situ* hybridization and NeuN immunolabeling**

176 All *in situ* hybridization experiments were accomplished under a ribonuclease-free condition. Mice  
177 (C57BL/6J) for *in situ* hybridization were treated as above, except for exclusion of picric acid from  
178 the fixative. The following hybridization procedure was performed as reported previously (Hioki et  
179 al., 2010; Ma et al., 2011). Briefly, sagittal sections from both hemispheres were cut at 20  $\mu$ m  
180 thickness using a freezing microtome. Free floating sections were hybridized for 16 – 20 h at 60°C  
181 with 1  $\mu$ g/mL digoxigenin (DIG)-labeled sense or antisense riboprobes in a hybridization buffer.  
182 After washes and ribonuclease A (RNase A) treatment, the sections were incubated overnight with  
183 1:1,000 diluted alkaline phosphatase-conjugated anti-DIG sheep antibody (11-093-274-910; Roche  
184 Diagnostics, Basel, Switzerland) and then reacted with 0.375 mg/mL nitroblue tetrazolium and 0.188  
185 mg/mL 5-bromo-4-chloro-3-indolylphosphate (NBT/BCIP; Roche Diagnostics) for 27 – 42 hours.  
186 Sense probes detected no signal higher than the background. To sensitively detect the signals for  
187 *Drd1a* and *Drd2* mRNA, we applied the biotinylated tyramine (BT)-glucose oxidase (GO)  
188 amplification method (Furuta et al., 2009; Ge et al., 2010; Kuramoto et al., 2009). Briefly, after  
189 hybridization with DIG-labeled *Drd1a* and *Drd2* riboprobes, the sections were incubated with 1:4,000  
190 diluted peroxidase-conjugated anti-DIG sheep antibody (11-207-733-910; Roche Diagnostics).  
191 Subsequently, the sections were reacted with a mixture containing 31  $\mu$ M BT, 3  $\mu$ g/mL of GO, 2  
192 mg/mL of beta-D-glucose, and 2% bovine serum albumin in 0.1 M PB for 30 min. The sections were  
193 further incubated with 1:1,000 diluted alkaline phosphatase-conjugated streptavidin (02516-71;  
194 Nacalai Tesque) for 2 h and finally reacted with NBT/BCIP. The probes for *Drd1a* (target sequence  
195 position; 1116-1809 GenBank: NM\_010076.3, Gifted from Shinichiro Okamoto) and for *Drd2* (target  
196 sequence position; 1412-2497 GenBank: X55674.1, Gifted from Shinichiro Okamoto) were used.

197 After *in situ* hybridization, the sections were processed for NeuN immunohistochemistry with  
198 conventional visualization for bright microscopy using avidin-biotin-peroxidase complex (ABC Elite;  
199 Vector, Burlingame, CA) and diaminobenzidine. The stained sections were serially mounted onto the  
200 gelatinized glass slides, dried, washed in running water, dried again, cleared in xylene, and finally  
201 covered with mounting medium MX (Matsunami, Kishiwada, Japan) and a glass coverslip. The  
202 boundaries of the D1R- and D2R-poor zones were determined with double immunofluorescent  
203 staining for D1R and D2R using the adjacent section.

## Striatonigral output of caudal striatal neurons

204

205

### 206 **2.4 Electrophysiological recording and post-hoc immunofluorescence**

207 For *in vitro* slice recording, a mouse (postnatal 3–4 weeks) was deeply anesthetized with isoflurane  
208 and decapitated. The brain was removed from the skull and immediately cooled for 2 min in ice-cold  
209 artificial cerebrospinal fluid (ACSF) oxidized with 95% O<sub>2</sub>/5% CO<sub>2</sub> gas. Then, a brain block  
210 containing the striatum was resected and coronally sectioned into slices of 300 μm thickness using a  
211 vibratome (7000smz-2, Campden, Leicestershire, UK) in cold ACSF. The sections were incubated  
212 for 20 min at 32°C and then over 1 h at RT for recovery. Striatal neurons and neurons in the  
213 neighboring nuclei were recorded using the whole cell patch clamp method with the aid of an EPC10  
214 amplifier (HEKA Elektronik Dr. Schulze GmbH, Lambrecht/Pfalz, Germany). The pipette solution  
215 was composed of K-gluconate 130; KCl<sub>2</sub>; Na<sub>2</sub>ATP 3; NaGTP 0.3; MgCl<sub>2</sub> 2; Na<sub>4</sub>EGTA 0.6; HEPES  
216 10; biocytin 20.1 (in mM). The pH was adjusted to 7.3 with KOH, and the osmolality was ~290  
217 mOsm. After recording, the slices were fixed using fixative composed of 4% paraformaldehyde and  
218 0.2% picric acid solved in 0.1 M PB overnight. The fixed slices were re-sectioned into 50 μm slices,  
219 and the recorded neurons filled with biocytin were visualized using fluorophore-conjugated  
220 streptavidin. The immunofluorescent reaction against DARPP32, known as a marker of MSNs, D1R,  
221 and D2R was conducted as above to confirm the location of the recorded neurons and if they were  
222 MSNs.

223

### 224 **2.5 Image acquisition and processing**

225 The specimens were observed using microscopes (BZ-X710, Keyence, Osaka, Japan; BX53  
226 equipped with a DP73 CCD camera, Olympus, Tokyo, Japan) or a confocal microscope (FV1200,  
227 Olympus). For fluorescent imaging, appropriate filter sets (359–371-nm excitation and 397-nm  
228 emission for Alexa Fluor (AF) 350 or 405; 450–490-nm excitation and 514–565-nm emission for  
229 AF488; 530–585-nm excitation and 575–675-nm emission for AF594; 590–650-nm excitation and  
230 655–675-nm emission for AF635) were applied. The images of each channel were obtained  
231 sequentially and separately to negate possible crosstalk of signals across channels. Sections  
232 processed for *in situ* hybridization were observed with bright field microscopy.

233 To quantify and compare immunofluorescent signals against D1R, D2R, and tyrosine hydroxylase  
234 (TH) across the striatal regions and among individual mice, first D1R- and D2R-poor regions were  
235 determined using line plots derived from corresponding images as shown in Figure 1B. The borders  
236 between the rostral striatum and D1R-poor zone, D1R-poor zone and D2R-poor zone, or D2R-poor  
237 zone and internal capsule, were determined using the derivative of each line plot as the point of  
238 maximum slope. Then, the borders were used to obtain regions of interest (ROIs, 200 × 200 μm<sup>2</sup>) in  
239 each region. To measure pixel intensity of the ROIs, small areas containing nerve bundles were  
240 masked.

241

## 242 **2.6 Statistical comparison**

243 All averaged values are represented as mean  $\pm$  standard deviation. The quantitative values among  
244 groups ( $> 2$ ) were compared using one-way ANOVA followed by the post-hoc Tukey test with the  
245 aid of commercial software: Microsoft Excel, R (language and environment for statistical computing  
246 and graphics similar to S, <http://cran.r-project.org/>), and MATLAB (MathWorks, Natick, MA). All p-  
247 values are presented. A p-value less than 0.05 is considered as statistically significant.

248

## 249 **3 Results**

### 250 **3.1 Uneven distribution of immunoreactivity of D1R and D2R in the mouse caudal striatum**

251 As compared with dorsal striatum (dStr), D1R-immunoreactivity was weak from 1.1 – 2.0 mm  
252 posterior to the bregma and from 2.8 mm to 3.3 mm lateral to the midline, whereas D2R-  
253 immunoreactivity was weak from 1.3 mm to 1.8 mm posterior to the bregma and from 2.7 mm to 3.2  
254 mm lateral to the midline (L2.7 to L3.2) in mouse. An example sagittal section (L3.0) was shown in  
255 Figure 1A and 1B (see Supplementary Figure 1 for detailed spatial distribution). In the above range,  
256 expression of D1R, D2R, and TH was not uniform in the striatum, rather, the zone with weak D1R  
257 and that with weak D2R existed in the caudo-ventral portion of the striatum (arrowhead in Figure 1A;  
258 cf. Gangarossa et al., 2013; Miyamoto et al., 2019). Hereafter they are referred to as D1R-poor zone  
259 and D2R-poor zone, respectively. In these zones, immunofluorescence for TH was also weak (Figure  
260 1A). This characteristic spatial expression of D1R, D2R, and TH was always observed in all samples  
261 used for this study ( $N = 42$  mice). To quantify these changes of fluorescence, fluorescence intensity  
262 line plots were obtained for D1R, D2R, and TH as shown in Figure 1B ( $N = 3$  mice). The fluorescent  
263 intensity was measured in ROIs located at the rostral striatum (rStr), D1R-poor zone, and D2R-poor  
264 zone, and then normalized by the values of rStr. Normalized D1R pixel intensity was significantly  
265 lower in D1R-poor zone ( $0.53 \pm 0.02$ ) than rStr ( $p = 0.00002$ ) or D2R-poor zone ( $0.92 \pm 0.06$ ;  $p =$   
266  $0.00008$ ) by one-way ANOVA with post-hoc Tukey test. In contrast, D2R expression was  
267 significantly lower in D2R-poor zone ( $0.33 \pm 0.08$ ) than rStr ( $p = 0.00003$ ) or D1R-poor zone ( $1.09 \pm$   
268  $0.03$ ;  $p = 0.00001$ ). TH pixel intensity was lower in D1R-poor zone and D2R-poor zone ( $0.41 \pm 0.04$   
269 and  $0.44 \pm 0.03$ , respectively) than rStr ( $p = 0.000001$  for D1R-poor zone and  $p = 0.000002$  for  
270 D2R-poor zone).

271 Since TH expresses in adrenergic axons as well as dopaminergic axons, it does not directly indicate  
272 dopaminergic systems only. Dopamine transporter (DAT) is purely expressed in dopaminergic  
273 nervous system, thus, we examined whether DAT expression showed similar spatial pattern to TH.  
274 As shown in Supplementary Figure 2, DAT and TH is highly overlapped in the whole striatum,  
275 except for subcallosal zones where DAT expression was high. These results suggest that  
276 dopaminergic innervation in the cStr differs compared to the rStr.

277

### 278 **3.2 Uneven distribution of mRNA of D1R and D2R in caudal striatal neurons in mice**

279 Since D1R and D2R are also expressed in presynaptic terminals, it is not clear whether the above  
280 investigation reflects differential cellular composition of specific area of the cStr. Even if the  
281 fluorescence mainly came from cell bodies, different fluorescence intensity could reflect total  
282 neuronal density among striatal regions. To directly solve the question, we investigated mRNA

## Striatonigral output of caudal striatal neurons

283 expression of *Drd1a* and *Drd2* genes by *in situ* hybridization. A section containing the poor zones  
284 was used for *in situ* hybridization with NeuN immunostaining. To confirm the poor zone identity, the  
285 adjacent section was used for double immunofluorescent staining of D1R and D2R (Figure 2A, B, D,  
286 E). As shown in Figure 2, *Drd1a* (Figure 2A, B) and *Drd2* (Figure 2D, E) were detected (dark blue)  
287 in cell bodies of striatal neurons expressing NeuN (brown). To compare zonal differences on the  
288 number and proportion of D1R- or D2R-neurons, we counted them in four areas using: rStr, para-  
289 poor zone, D1R-poor zone, and D2R-poor zone (see Figure 1A for subdivision of the striatum used in  
290 this study). The number of NeuN immunopositive cells did not significantly differ among four ROIs  
291 ( $N = 5,689$  neurons in total from three mice, one section in each;  $p = 0.14$ ; Figure 2G), suggesting  
292 that the cell density of the striatum, most of which probably regarded as the MSNs density, seems to  
293 be uniform even in the two poor-zones. The number of *Drd1a* or *Drd2* expressing neurons were  
294 counted in one representative section for each mouse ( $N = 3$  mice;  $N = 2,615$  neurons for *Drd1a* and  
295  $N = 3,074$  neurons for *Drd2*). The proportion of *Drd1a*-expressing neurons to total neurons was  $12.23$   
296  $\pm 1.43\%$  ( $N = 73/593$  neurons as sum of three mice) in D1R-poor zone,  $82.06 \pm 3.08\%$  ( $N = 528/645$ )  
297 in D2R-poor zone,  $50.44 \pm 0.07\%$  ( $N = 354/702$ ) in rStr, and  $46.49 \pm 1.34\%$  ( $N = 315/675$ ) in para-  
298 poor zone, which were significantly different among these regions ( $p = 0.0000507$  using one-way  
299 ANOVA). Post-hoc Tukey test revealed that the proportion of *Drd1a*-expressing neurons was  
300 significantly lower in D1R-poor zone ( $p = 0.0000001$  vs. rStr;  $p = 0.0000001$  vs. para-poor zone;  $p =$   
301  $0.0000001$  vs. D2R-poor zone), and significantly higher in D2R-poor zone than the other three  
302 regions ( $p = 0.0000001$  vs. rStr;  $p = 0.0000001$  vs para-poor zone) (Figure 2C). No significant  
303 difference was observed for rStr vs. para-poor zone ( $p = 0.13$ ). On the other hand, the proportion of  
304 *Drd2*-expressing neurons to total neurons was  $78.68 \pm 1.73\%$  ( $N = 539/686$ ) in D1R-poor zone,  $3.58$   
305  $\pm 1.19\%$  ( $N = 28/786$ ) in D2R-poor zone,  $46.78 \pm 4.23\%$  ( $N = 366/781$ ) in rStr, and  $46.73 \pm 4.13\%$   
306 ( $N = 382/821$ ) in para-poor zone. The proportion was significantly different among these four regions  
307 ( $p = 0.000006$  using one-way ANOVA). D2R-poor zone contained a significantly lower proportion  
308 of D2R-expressing neurons than the other regions ( $p = 0.0000007$  vs. rStr;  $p = 0.0000007$  vs. para-  
309 poor zone;  $p = 0.0000001$  vs. D1R-poor zone). D1R-poor zone contained a significantly higher  
310 number of D2R-expressing neurons than others ( $p = 0.0000076$  vs. rStr;  $p = 0.0000075$  vs. para-poor  
311 zone) (Figure 2F). Again, no significant difference was observed between rStr and para-poor zone ( $p$   
312  $= 0.99999$ ). Since we could not visualize both *Drd1a* and *Drd2* simultaneously, composition of them  
313 in each area was elucidated as the sum of individual data in Figure 2H. These results clearly indicated  
314 distinct cell type composition of both D1R- and D2R-poor zones, in which either D2R or D1R  
315 expressing neurons occupied over 80% of total neurons.

316

### 317 **3.3 MSNs in D1R- or D2R-poor zones possessed similar membrane properties to those in the** 318 **dorsal striatum.**

319 Since both poor zones are located close to the boundary between the striatum and the amygdala-  
320 striatal transition area (AST), we wondered whether these dopamine receptor poor zones are  
321 composed of MSNs possessing similar properties to other parts of the striatum. First, we confirmed  
322 DARPP32, a molecular marker of MSNs, expressed in  $93.5 \pm 0.9\%$ ,  $92.6 \pm 0.5\%$ , and  $92.1 \pm 0.5\%$  of  
323 NeuN-expressing cells in the dStr ( $N = 351$  cells), D1R-poor zone ( $N = 374$  cells), and D2R- poor  
324 zone ( $N = 469$  cells), respectively ( $N = 3$  mice). Second, whole cell patch clamp recordings were  
325 accomplished from medium sized neurons in those area, and recorded neurons were examined for



326 post-hoc immunofluorescence against DARPP32 (Figure 3). As a result, all medium sized neurons  
327 recorded in the dStr and D1R- or D2R-poor zone represented similar membrane properties, such as  
328 deep resting membrane potentials, narrow action potentials, and low input resistances ( $p > 0.05$  by  
329 one-way-ANOVA; Figure 3C, Table 3). In addition, all neurons which possessed  
330 electrophysiological properties of MSNs expressed DARPP32 (N = 3 neurons in the dStr, N = 5 in  
331 D1R-poor zone, and N = 4 in D2R-poor zone). In some neurons, their dendrites were well visualized,  
332 and they were spiny (Figure 3B). Thus, both poor zones are composed of MSNs as the dStr is.

333

### 334 **3.4 Retrogradely labeled direct pathway neurons were mainly distributed in D2R-poor zone in** 335 **the mouse caudal striatum**

336 To uncover whether D1R-expressing neurons in the poor zones project to the downstream basal  
337 ganglia nuclei as those in dStr, namely, direct pathway, retrograde neural tracing was conducted.  
338 Since the precise projection targets of the poor zones remain unknown, large volume of CTB555 or  
339 CTB488 was injected around wide brain regions located along with the striatonigral pathway. It is  
340 also important the injections must be located enough posterior to GP to avoid labeling of the indirect  
341 pathway neurons. As shown in Figure 4A, the tracer injection extended to the SNpr, SNpc, and EP,  
342 but not to GP which is the target of striatal indirect pathway neurons.

343 The retrogradely labeled neurons in the striatum appeared to be distributed in dStr and D2R-poor  
344 zone, avoiding D1R-poor zone (Figure 4B). For quantification, a ROI ( $512 \times 512$  pixels in images  
345 with resolution of  $0.62 \mu\text{m}/\text{pixel}$ ) was sampled from each striatal region as conducted for mRNA  
346 expression comparison written above: namely, dStr (Figure 4C1), para-poor zone (Figure 4C2), D1R-  
347 poor zone (Figure 4C3), and D2R-poor zone (Figure 4C4) from three mice (one section/mouse). In  
348 total, 2,252 retrogradely labeled neurons, which can be considered as direct pathway neurons, were  
349 counted stereologically. The density of labeled neurons in four striatal regions was significantly  
350 different ( $p = 2 \times 10^{-6}$  using one-way ANOVA), and the density was lower in D1R-poor zone ( $2.57 \pm$   
351  $0.42 \times 10^4$  neurons/ $\text{mm}^3$ ) than dStr ( $7.52 \pm 0.50 \times 10^4$  neurons/ $\text{mm}^3$ ,  $p = 0.0018$  using post-hoc  
352 Tukey test), para-poor zone ( $8.30 \pm 1.12 \times 10^4$  neurons/ $\text{mm}^3$ ,  $p = 0.00068$ ), or D2R-poor zone ( $11.32$   
353  $\pm 1.63 \times 10^4$  neurons/ $\text{mm}^3$ ,  $p = 0.00003$ )(Figure 4D). In contrast, the density of labeled neurons in  
354 D2R-poor zone was significantly higher than dStr ( $p = 0.009$ ) and D1R-poor zone, and para-poor  
355 zone ( $p = 0.03$ ) (Figure 4D).

356 However, the relationship between dopamine receptor subtypes and projection properties, namely,  
357 direct pathway neurons express D1R wherein indirect pathway neurons express D2R, might not be  
358 applied to these atypical striatal regions. Thus, we also combined *in situ* hybridization with  
359 retrograde tracing study to examine D1R or D2R gene expression in retrogradely labeled neurons for  
360 bright field microscopy using immunoreaction against CTB. As shown in Figure 4E and F, CTB  
361 labeled neurons (brown), regarded as direct pathway neurons, expressed *Drd1a* (99.3%, N = 863/869)  
362 but not *Drd2* (1.1%, N = 9/843) mRNA (blue).

363

### 364 **3.5 Axonal projections from cdStr, D1R- or D2R-poor zones in mouse**

365 So far, we showed D1R-poor zone is composed of ~80% of indirect pathway neurons expressing  
366 D2R and D2R-poor zone ~80% of direct pathway neurons expressing D1R. A crucial question to be

## Striatonigral output of caudal striatal neurons

367 uncovered is whether outputs of D1R- and D2R-poor zones are similar to D1R- and D2R-neurons  
368 located in non-poor zones, the dorsal part of caudal striatum (cdStr; see Figure 1A for subdivision of  
369 the striatum used here). To visualize their axonal projections, small volume of anterograde tracer  
370 (BDA, 10 kD or PHAL) was injected to the cStr including D1R- and D2R-poor zones. Due to the  
371 small spatial volume of the poor zones, the deposit of BDA should be extremely small to avoid  
372 spreading BDA to neighboring striatal regions (Figure 5A). Using immunofluorescence against D1R  
373 and D2R, locations of injection sites were examined. As a result, we obtained four cases for injection  
374 to D1R-poor zone and one case for that to D2R-poor zone. In one remaining case, injection was  
375 centered at the border between D1R- and D2R-poor zones. For cdStr, the size of injection was larger  
376 than poor zones labeling (N = 3 mice). The resulted axon projection was similar in these injections.  
377 The labeled axons were mainly found in SNpl and GP (Figures 5 and 6), and probably they are  
378 targets of direct and indirect pathway MSNs, respectively. Notably, SNpl was a characteristic target  
379 of the direct pathway from the poor zones, whereas only a few collaterals were observed in EP, SNpr  
380 and SNpc (Figure 5, Supplementary Figure 3). We did not observe clear difference between  
381 projections from D1R- and D2R-poor zones, although only one sample was obtained for micro  
382 injection to D2R-poor zone. In comparison to the cdStr, poor zones tentatively projected to the dorsal  
383 part of SNpl whereas cdStr tended to project to the ventral part of SNpl. PHAL injection to cdStr  
384 labeled axons in EP and SNpr also, in addition to the SNpl. For projection to GP, the axons of both  
385 poor zones and cdStr were distributed in the caudal GP, not in the rostral GP (Figure 6A). Retrograde  
386 tracer injection to SNpl also labeled large neurons in the caudal GP, as well as putative MSNs in cStr  
387 including both D1R- and D2R-poor zones (Figure 6B).

388 We also observed the axons in zona incerta, thalamic ventral posterior nucleus (VPM and VPL),  
389 thalamic reticular nucleus (Rt), medial geniculate nucleus (MG). Since in the cStr including poor  
390 zones, several neural fibers are passing through, BDA could provide ectopic labeling other than the  
391 injection center through such fibers or terminals in the striatum. We found a few labeled neurons in  
392 multiple cortical areas, thalamus, and brainstem; thus, the above ectopic labeling may be  
393 contaminated with actual striatal projections.

394 To confirm projection from the poor zones, retrograde tracers, fluorogold (FG) or CTB555, was  
395 injected into either MG or SNpl (Supplementary figure 4). We found prominent retrograde labeling  
396 in cStr by SNpl injection, as well as labeling in the caudal GP. Meanwhile, little to no labeling in cStr  
397 was observed by MG injection, and rather MG injection provided intensive labeling in the multiple  
398 cortical areas (the primary and secondary somatosensory area (S1 and S2); dorsal and ventral  
399 auditory area (Au), temporal association area (TEA) and amygdala. Thus, the main target of the  
400 direct pathway in the poor zones must be SNpl.

401

### 402 **3.6 Uneven distribution of immunoreactivity of D1R and D2R in the caudal striatum across the** 403 **age and species**

404 To determine whether the uneven distribution of immunoreactivity of D1R and D2R in cStr is  
405 conserved across strains, C57BL/6J and ICR mice, and Long-Evans and Wistar rats were used for  
406 triple immunofluorescence of D1R, D2R and TH (N = 3 animals for each). In addition, to investigate

407 this uneven distribution is conserved across ages, young (postnatal 8 days, and 3-4 weeks) and old  
408 (60-172 weeks) C57BL/6J mice were also used for the triple immunofluorescence study (Figure 7).

409 In three young C57BL/6J mice (4-weeks old in Figure 7) examined, the uneven distribution of D1R,  
410 D2R, and TH was observed, with essentially the same spatial pattern as observed in adult mice (8-14  
411 weeks). In addition, D1R- and D2R-poor zones still existed in old aged C57BL/6J mice (61 weeks,  
412 111 weeks, and 172 weeks). The uneven distribution was also observed in ICR mice (11 weeks; N =  
413 3). The uneven distribution of D1R and D2R were also found in the cStr of Wistar (N = 3, Figure 7C)  
414 and Long-Evans rats (N = 3, Figure 7D), as reported previously (Gangarossa et al., 2019). As the  
415 same as mice, D2R-poor zone was always located at the most caudal part of the striatum, and D1R-  
416 poor zone was rostral to and medial to D2R-poor zone, although the appearance (shape and size) was  
417 bit different from those in mice. The boundary of D1R- and D2R-poor zones extended to more dorsal  
418 in Long-Evans rats than Wister rats (Figure 7C and D).

419 To determine whether the uneven distribution of D1R, D2R, and TH is specific to rodents, the  
420 striatum of common marmosets, which is a nonhuman primate, was also examined (N = 2, Figure 7E,  
421 F). In the primate, the striatum exclusively subdivides further into two nuclei, the putamen and  
422 caudate nucleus. In the marmoset, the unique region with uneven distribution of D1R and D2R was  
423 found around the ventral tip of tail of the caudate (CDt). D1R- and D2R-poor zones adjoined, and  
424 D1R-poor zone was located laterally to D2R-poor zone, as observed in rodents. However, it is  
425 difficult to determine whether the spatial composition is similar to rodents due to anatomical  
426 structural differences of the striatum between them.

427

## 428 **4 Discussion**

429 In the present study, we demonstrated that in cStr, the rule of cellular correlation between dopamine  
430 receptor expression and projection pathways was conserved in the unusual part of the striatum where  
431 D1R-MSNs and D2R-MSNs are unevenly distributed. To the best of our knowledge, this is the first  
432 report which describes axonal projections from D1R-poor zones, although for D2R poor zone,  
433 Gangarossa et al. (2013) reported that it projected to SNpr and EP (Valjent & Gangarossa, 2020). We  
434 identified the characteristic projections from the poor zones to SNpl via the direct pathway, and to the  
435 caudal GP via the indirect pathway (Figures 5 and 6). We also showed that the electrophysiological  
436 properties of MSNs in the poor zones were similar to those observed in other striatal area (Figures 3,  
437 Table 3), and identified the poor zones in primates (Figure 7).

438

### 439 **4.1 Methodological consideration**

440 One may consider the present axonal tracing might be limited, since the tracer deposit in the poor  
441 zones must be extremely small. It could cause incomplete labeling. Therefore, we cannot exclude the  
442 possibility of additional projections to other brain areas not detected in the present study, and of  
443 potential projection differences from two poor zones. However, we also obtained the same results of  
444 axon labeling using adenoassociated viral vectors (AAV), which can increase sensitivity of  
445 visualization (data not shown). Moreover, the projections originated from a smaller population of  
446 MSNs in each poor zone, namely, D1R-neurons in D1R-poor zone or D2R-neurons in D2R-poor

## Striatonigral output of caudal striatal neurons

447 zone, were successfully visualized. Thus, it is highly likely that characteristics of principal  
448 projections from the poor zones were obtained.

449

### 450 **4.2 Dual pathway neurons in D1R- and D2R-poor zones**

451 In transgenic mice, the uneven distribution of D1R and D2R expressing neurons in the cStr  
452 (Gangarossa et al., 2013, 2019; Miyamoto et al., 2019). The present study with wild type C57BL/6J  
453 mice also showed the uneven distribution of D1R and D2R expressing neurons in cStr and the  
454 coordinates of the boundary of D1R- and D2R-poor zones appear to be coincidence (Figures 1A-C).

455 The cellular distribution is not always the same as the distribution of immunoreactivity because the  
456 protein, which is visualized by immunohistochemistry, is expressed at not only soma but also  
457 dendrites and axons. We then performed *in situ* hybridization study and revealed the complementary  
458 distribution of *Drd1a* and *Drd2* expressing neurons in both D1R- and D2R-poor zones (Figure 2H).  
459 These findings suggest the possibility that the direct and indirect pathway neurons are unevenly  
460 distributed in the cStr.

461 To address this question, we initially performed a retrograde tracing study combined with  
462 immunohistochemistry. The proportion of retrogradely labeled striatonigral neurons, considered as  
463 direct pathway neurons, were significantly lower in D1R-poor zone and significantly higher in D2R-  
464 poor zone than other regions (Figure 4A-D). It is noteworthy that the estimated density of striatal  
465 neurons by our large volume tracer injections is consistent with an early report (Rosen & Williams,  
466 2001), suggesting that a large population of direct pathway neurons could be labeled and the  
467 differences on the labeled neuron density are not caused by biased topographic distribution of  
468 projection neurons. In addition, the combined study of *in situ* hybridization with retrogradely labeling  
469 showed that the retrogradely labeled direct pathway neurons expressed *Drd1a*, but not *Drd2* mRNA  
470 (Figure 2E, F). These findings indicated that the distribution of direct pathway neurons in the cStr is  
471 highly biased toward D2R-poor zone. Owing to the existence of axon collaterals of the direct  
472 pathway neurons in GP (Fujiyama et al., 2011; Kawaguchi et al., 1990; Levesque and Parent, 2005),  
473 it is difficult to label only indirect pathway neurons using neural tracers. Nevertheless, our data  
474 suggested that D2R-neurons in the poor zones are likely to target GP as those in other striatal area,  
475 because the D1R-poor zone projection was denser in GP than in EP and/or SN (Figures 4 and 5). In  
476 addition, retrograde tracer injection revealed that both caudal GP and cStr convergently projected to  
477 SNpl. Thus, the direct and indirect pathway neurons in the poor zones could form complementary  
478 circuitry, even though they were distributed unevenly.

479

480 In addition, we showed the existence of D1R- and D2R-poor zones using young and aged C57BL/6J  
481 mice, ICR mice, Wister rats, Long-Evans rats, and common marmosets (Figure 7). The preservation  
482 of D1R- and D2R-poor zones across age and species suggest that such unique regions are necessary  
483 for information processing. The cStr, including poor zones, is innervated by the sensory cortices and  
484 suggests a possible relationship between sensory inputs and the poor zone development. However, it  
485 might be not the case. The poor zones were already present at ~P8, when behavioral reactions to  
486 tones or to visions are not yet elicited (Ehret, 1976; Huberman et al., 2008). Moreover the poor  
487 zones were preserved in aged C57BL6/J mice irrespective of their hard of hearing in general (Zheng

488 et al., 1999), although sensory deprivation affects synaptic transmission in the sensory striatum  
489 (Mowery et al., 2017). Thus, structure of the poor zones could develop and maintain without sensory  
490 signals.

491

492

### 493 **4.3 The caudal striatum and the poor zone in rodents and primate**

494

495 Recent studies with primate and rodent throw light on the functional aspect of the cStr. In the  
496 macaque monkey, the CDt, which is a long C-shaped structure of the ventral part of the caudate  
497 nucleus, has been reportedly involved in the distinct value function (Griggs et al., 2017; Kim et al.,  
498 2017; Kim et al., 2014; Kim and Hikosaka, 2013, 2015). These findings can also be explained by the  
499 CDt receiving the distinct subpopulation of dopaminergic neurons in SNpc. Meanwhile, the poor  
500 zones in the common marmosets revealed here were located in approximately the most rostral end of  
501 the CDt. This part of the CDt is small, therefore, its neural connection and function are still not clear.  
502 On the other hand, Menegas et al. (2017, 2018) reported that the tail of the striatum in rodents  
503 involved in the saliency and aversion. In addition, the shape of the poor zones also differed even in  
504 mice and rats (Figure 7). Thus, anatomical and functional similarity of the poor zones and the tail of  
505 the striatum among species warrants further research.

506

### 507 **4.4 Functional implications of the poor zone**

508

509 We reported that the main projection target of the cStr, including the poor zones, was SNpl. The  
510 previous studies reported that cStr subregions receiving auditory cortical inputs project to the SNpl,  
511 whereas cStr subregions receiving visual cortical inputs to the lateroventral SNpr (Deniau et al.,  
512 1996; Kohno et al., 1984). Such meso-scale topographic relationship was also reported in primates  
513 (Hedreen and DeLong, 1991). In turn, ventral SNpl is known to project to the superior colliculus  
514 (SC), inferior colliculus (IC), VPM, and so on; namely, it innervates the sensory-related regions of  
515 the thalamus and midbrain (Cebrian et al., 2005; Moriizumi et al., 1992; Takada, 1992; Yasui et al.,  
516 1991). In addition, cStr is innervated by sensory related cortical areas :auditory, visual, secondary  
517 sensory, TeA, and perirhinal areas(Hintiryan et al., 2016; Hunnicutt et al., 2016; Jiang and Kim,  
518 2018; Yeterian and Pandya, 1998; Yeterian and Van Hoesen, 1978). Taken together, cStr can  
519 contribute to the gating and integration of multimodalities of sensation via SN in rodents, being  
520 similar to SN-subregion dependent information coding reported in primates (Amita et al., 2020; Kim  
521 and Hikosaka, 2015; Yamamoto et al., 2012; Yasuda and Hikosaka, 2015). Our anterograde and  
522 retrograde tracing also suggested that the caudal GP is likely to constitute the indirect pathway of  
523 cStr including poor zones, which projected to SNpl (Figure 6), as reported in primates (Amita and  
524 Hikosaka, 2019). Furthermore, cdStr and poor zones tended to project different parts of the SNpl  
525 (Supplementary Figure 3), which suggests a potential functional differentiation between cdStr and  
526 the poor zones.

527

### 528 **4.5 Is the poor zone an exception of the striatum?**

529

530 The classical model for the basal ganglia network suggests that normal function requires a balance of  
531 the direct and indirect pathway neurons mediated by D1R and D2R, respectively. The uneven  
532 distribution of the two MSNs population in the cStr raised a question regarding the balance between  
533 the direct and indirect pathway neurons. If the balance in the poor zones was as critical as other  
534 striatal areas, the two poor zones would share neural information with the aid of common inputs  
535 and/or mutual connections, or local circuitry within each zone. Whether D1R- and D2R-poor zones

## Striatonigral output of caudal striatal neurons

536 share common cortical inputs remains to be determined; if they do, therefore two poor zones can  
537 work as one unit, like other striatal area containing equal number of D1R- and D2R-neurons. It is  
538 also possible that both poor zones could be innervated by different population of cortical neurons. In  
539 other striatal regions, the cortical axons in the adjoining striatal areas are originated from the adjacent  
540 but segregated cortical regions (Ghosh and Zador, 2021; Hooks et al., 2018). In such a case, two poor  
541 zones might communicate to compensate for the highly biased distribution of the direct and indirect  
542 pathway neurons, if they still need to work in a coordinated manner.

543 Alternatively, unlike motor or limbic related information processing in the striatum, these poor zones  
544 could work via either the direct or indirect pathway. If this was the case, lesser dopaminergic  
545 innervation specifically observed in the poor zones, which is likely to be from the SNpl (Jiang and  
546 Kim, 2018; Menegas et al., 2015; Poulin et al., 2018; Watabe-Uchida et al., 2012) could also relate to  
547 such unusual striatal circuitry. Furthermore, to determine whether the poor zones and cdStr are  
548 functionally differentiated, and whether the cStr is a counterpart of the primate CDt, neural tracing  
549 and functional recording/imaging in extremely fine scales are required, which will help to understand  
550 the two pathways beyond the current concept .

551

### 552 **Abbreviations**

553 ACSF, artificial cerebrospinal fluid; AP, antero-posterior; AST, amygdala-striatal transition area; Au,  
554 auditory area; BDA, biotinylated dextran amine; CDt, caudate tail; cStr, caudal striatum; cdStr,  
555 caudo-dorsal striatum; CTB, cholera toxin subunit B; DAT, dopamine transporter; dStr, dorsal  
556 striatum; D1R, dopamine receptor D1; D2R, dopamine receptor D2; EP, entopeduncular nucleus; FG,  
557 fluorogold; GP, globus pallidus; LM, latero-medial; MG, medial geniculate nucleus; MSN, medium  
558 spiny neuron; PB, phosphate buffer; PBS, phosphate buffered saline; PHAL, phaseolus vulgaris  
559 leucoagglutinin; ppz, para-poor zone; rStr, rostral striatum; RT, room temperature; SNpc, substantia  
560 nigra pars compacta; SNpl, substantia nigra pars lateralis; SNpr, substantia nigra pars reticulata; TH,  
561 tyrosine hydroxylase; VPM, ventral posterior nucleus of thalamus, the medial part; VPL, ventral  
562 posterior nucleus of thalamus, the lateral part

563

564

565

566

567

### 568 **5 Conflict of Interest**

569 The authors declare that the research was conducted in the absence of any commercial or financial  
570 relationships that could be construed as a potential conflict of interest.

### 571 **6 Author Contributions**

572 All authors had full access to the data in the study and take responsibility for the integrity of the data  
573 and the accuracy of the data analysis. Conceptualization, F.F. and F. Karube; Methodology, F.  
574 Karube., Y.H. and K.O.; Investigation, K.O., F. Karube, F. Kadono, Y.H., and F.F.; Formal Analysis,  
575 K.O., F. Kadono, F. Karube, and Y.H.; Resources, K.I. and M.T.; Writing - Original Draft, K.O., F.F.  
576 and F. Karube; Writing - Review & Editing, F.F. F. Karube, F. Kadono, K.O., Y.H.; Visualization,  
577 K.O., F. Karube; Supervision, F.F. and F. Karube.; Funding Acquisition, F.F., F. Karube.

## 578 **7 Funding**

579 This study was funded by Grants-in-Aid from The Ministry of Education, Culture, Sports, Science,  
580 and Technology (MEXT) and Japan Society for the Promotion of Science (JSPS) for Scientific  
581 Research (20H03549 to FF) for Exploratory Research (20K20671 to FF) and for Scientific  
582 Researches on Innovative Areas “Hyper-Adaptability” (20H05484 to FF), and for Scientific  
583 Researches on Innovative Areas “Adaptation Circuit Census” (21H05241 to FF and to F. Karube).

## 584 **8 Acknowledgments**

585 We thank Drs. H Hioki and S Okamoto for suggestions on in situ hybridization. We thank Dr. S.  
586 Takahashi and Mr. T. Higashiyama for helpful discussion. We also thank Dr. Y Sakurai for  
587 supervision and kind encouragement.

588

## 589 **9 References**

- 590 Albin, R.L., Young, A.B., and Penney, J.B. (1989). The functional anatomy of basal ganglia  
591 disorders. *Trends in neurosciences* *12*, 366-375.
- 592 Alexander, G.E., and Crutcher, M.D. (1990). Functional architecture of basal ganglia circuits: neural  
593 substrates of parallel processing. *Trends in neurosciences* *13*, 266–271.
- 594 Alexander, G.E., DeLong, M.R., and Strick, P.L. (1986). Parallel organization of functionally  
595 segregated circuits linking basal ganglia and cortex. *Annual review of neuroscience* *9*, 357-381.
- 596 Amita, H., and Hikosaka, O. (2019). Indirect pathway from caudate tail mediates rejection of bad  
597 objects in periphery. *Sci Adv* *5*, eaaw9297.
- 598 Amita, H., Kim, H.F., Inoue, K.I., Takada, M., and Hikosaka, O. (2020). Optogenetic manipulation  
599 of a value-coding pathway from the primate caudate tail facilitates saccadic gaze shift. *Nature*  
600 *communications* *11*, 1876.
- 601 Brown, V.J., Desimone, R., and Mishkin, M. (1995). Responses of cells in the tail of the caudate  
602 nucleus during visual discrimination learning. *Journal of neurophysiology* *74*, 1083-1094.
- 603 Caan, W., Perrett, D.I., and Rolls, E.T. (1984). Responses of striatal neurons in the behaving monkey.  
604 *2. Visual processing in the caudal neostriatum. Brain research* *290*, 53-65.
- 605 Calabresi, P., Picconi, B., Tozzi, A., Ghiglieri, V., and Di Filippo, M. (2014). Direct and indirect  
606 pathways of basal ganglia: a critical reappraisal. *Nature neuroscience* *17*, 1022-1030.
- 607 Cebrian, C., Parent, A., and Prensa, L. (2005). Patterns of axonal branching of neurons of the  
608 substantia nigra pars reticulata and pars lateralis in the rat. *The Journal of comparative neurology* *492*,  
609 349-369.
- 610 Cui, G., Jun, S.B., Jin, X., Pham, M.D., Vogel, S.S., Lovinger, D.M., and Costa, R.M. (2013).  
611 Concurrent activation of striatal direct and indirect pathways during action initiation. *Nature* *494*,  
612 238-242.

## Striatonigral output of caudal striatal neurons

- 613 Deniau, J.M., Menetrey, A., and Charpier, S. (1996). The lamellar organization of the rat substantia  
614 nigra pars reticulata: segregated patterns of striatal afferents and relationship to the topography of  
615 corticostriatal projections. *Neuroscience* 73, 761-781.
- 616 Ehret, G. (1976). Development of absolute auditory thresholds in the house mouse (*Mus musculus*). *J*  
617 *Am Audiol Soc* 1, 179-184.
- 618 Friend, D.M., and Kravitz, A.V. (2014). Working together: basal ganglia pathways in action selection.  
619 *Trends in neurosciences* 37, 301-303.
- 620 Fujiyama, F., Sohn, J., Nakano, T., Furuta, T., Nakamura, K.C., Matsuda, W., and Kaneko, T. (2011).  
621 Exclusive and common targets of neostriatofugal projections of rat striosome neurons: a single  
622 neuron-tracing study using a viral vector. *The European journal of neuroscience* 33, 668-677.
- 623 Furuta, T., Kaneko, T., and Deschenes, M. (2009). Septal neurons in barrel cortex derive their  
624 receptive field input from the lemniscal pathway. *The Journal of neuroscience : the official journal of*  
625 *the Society for Neuroscience* 29, 4089-4095.
- 626 Gangarossa, G., Castell, L., Castro, L., Tarot, P., Veyrunes, F., Vincent, P., Bertaso, F., and Valjent,  
627 E. (2019). Contrasting patterns of ERK activation in the tail of the striatum in response to aversive  
628 and rewarding signals. *Journal of neurochemistry* 151, 204-226.
- 629 Gangarossa, G., Espallergues, J., Maily, P., De Bundel, D., de Kerchove d'Exaerde, A., Herve, D.,  
630 Girault, J.A., Valjent, E., and Krieger, P. (2013). Spatial distribution of D1R- and D2R-expressing  
631 medium-sized spiny neurons differs along the rostro-caudal axis of the mouse dorsal striatum.  
632 *Frontiers in neural circuits* 7, 124.
- 633 Ge, S.N., Ma, Y.F., Hioki, H., Wei, Y.Y., Kaneko, T., Mizuno, N., Gao, G.D., and Li, J.L. (2010).  
634 Coexpression of VGLUT1 and VGLUT2 in trigeminothalamic projection neurons in the principal  
635 sensory trigeminal nucleus of the rat. *The Journal of comparative neurology* 518, 3149-3168.
- 636 Gerfen, C.R. (1989). The neostriatal mosaic: striatal patch-matrix organization is related to cortical  
637 lamination. *Science* 246, 385-388.
- 638 Ghosh, S., and Zador, A.M. (2021). Corticostriatal Plasticity Established by Initial Learning Persists  
639 after Behavioral Reversal. *eNeuro* 8.
- 640 Graybiel, A.M. (1990). Neurotransmitters and neuromodulators in the basal ganglia. *Trends in*  
641 *neurosciences* 13, 244-254.
- 642 Griggs, W.S., Kim, H.F., Ghazizadeh, A., Gabriela Costello, M., Wall, K.M., and Hikosaka, O.  
643 (2017). Flexible and Stable Value Coding Areas in Caudate Head and Tail Receive Anatomically  
644 Distinct Cortical and Subcortical Inputs. *Frontiers in neuroanatomy* 11, 106.
- 645 Hedreen, J.C., and DeLong, M.R. (1991). Organization of striatopallidal, striatonigral, and  
646 nigrostriatal projections in the macaque. *The Journal of comparative neurology* 304, 569-595.
- 647 Hikosaka, O., Takikawa, Y., and Kawagoe, R. (2000). Role of the basal ganglia in the control of  
648 purposive saccadic eye movements. *Physiological reviews* 80, 953-978.
- 649 Hintiryan, H., Foster, N.N., Bowman, I., Bay, M., Song, M.Y., Gou, L., Yamashita, S., Bienkowski,  
650 M.S., Zingg, B., Zhu, M., *et al.* (2016). The mouse cortico-striatal projectome. *Nature neuroscience*  
651 19, 1100-1114.
- 652 Hioki, H., Nakamura, H., Ma, Y.F., Konno, M., Hayakawa, T., Nakamura, K.C., Fujiyama, F., and  
653 Kaneko, T. (2010). Vesicular glutamate transporter 3-expressing nonserotonergic projection neurons  
654 constitute a subregion in the rat midbrain raphe nuclei. *The Journal of comparative neurology* 518,  
655 668-686.
- 656 Hooks, B.M., Papale, A.E., Paletzki, R.F., Feroze, M.W., Eastwood, B.S., Couey, J.J., Winnubst, J.,  
657 Chandrashekar, J., and Gerfen, C.R. (2018). Topographic precision in sensory and motor  
658 corticostriatal projections varies across cell type and cortical area. *Nature communications* 9, 3549.



- 659 Huberman, A.D., Feller, M.B., and Chapman, B. (2008). Mechanisms underlying development of  
660 visual maps and receptive fields. *Annual review of neuroscience* *31*, 479-509.
- 661 Hunnicutt, B.J., Jongbloets, B.C., Birdsong, W.T., Gertz, K.J., Zhong, H., and Mao, T. (2016). A  
662 comprehensive excitatory input map of the striatum reveals novel functional organization. *eLife* *5*.
- 663 Isomura, Y., Takekawa, T., Harukuni, R., Handa, T., Aizawa, H., Takada, M., and Fukai, T. (2013).  
664 Reward-modulated motor information in identified striatum neurons. *The Journal of neuroscience :  
665 the official journal of the Society for Neuroscience* *33*, 10209-10220.
- 666 Jiang, H., and Kim, H.F. (2018). Anatomical Inputs From the Sensory and Value Structures to the  
667 Tail of the Rat Striatum. *Frontiers in neuroanatomy* *12*, 30.
- 668 Kawaguchi, Y., Wilson, C.J., and Emson, P.C. (1990). Projection subtypes of rat neostriatal matrix  
669 cells revealed by intracellular injection of biocytin. *The Journal of neuroscience : the official journal  
670 of the Society for Neuroscience* *10*, 3421-3438.
- 671 Kim, H.F., Amita, H., and Hikosaka, O. (2017). Indirect Pathway of Caudal Basal Ganglia for  
672 Rejection of Valueless Visual Objects. *Neuron* *94*, 920-930 e923.
- 673 Kim, H.F., Ghazizadeh, A., and Hikosaka, O. (2014). Separate groups of dopamine neurons innervate  
674 caudate head and tail encoding flexible and stable value memories. *Frontiers in neuroanatomy* *8*, 120.
- 675 Kim, H.F., and Hikosaka, O. (2013). Distinct basal ganglia circuits controlling behaviors guided by  
676 flexible and stable values. *Neuron* *79*, 1001-1010.
- 677 Kim, H.F., and Hikosaka, O. (2015). Parallel basal ganglia circuits for voluntary and automatic  
678 behaviour to reach rewards. *Brain : a journal of neurology* *138*, 1776-1800.
- 679 Kohno, J., Shiosaka, S., Shinoda, K., Inagaki, S., and Tohyama, M. (1984). Two distinct strio-nigral  
680 substance P pathways in the rat: An experimental immunohistochemical study. *Brain research* *308*,  
681 309-317.
- 682 Krajcski, R.N., Macey-Dare, A., van Heusden, F., Ebrahimjee, F., and Ellender, T.J. (2019).  
683 Dynamic postnatal development of the cellular and circuit properties of striatal D1 and D2 spiny  
684 projection neurons. *The Journal of physiology* *597*, 5265-5293.
- 685 Kreitzer, A.C., and Malenka, R.C. (2008). Striatal plasticity and basal ganglia circuit function.  
686 *Neuron* *60*, 543-554.
- 687 Kuramoto, E., Furuta, T., Nakamura, K.C., Unzai, T., Hioki, H., and Kaneko, T. (2009). Two types  
688 of thalamocortical projections from the motor thalamic nuclei of the rat: a single neuron-tracing study  
689 using viral vectors. *Cerebral cortex* *19*, 2065-2077.
- 690 Lança, A.J., Boyd, S., Kolb, B.E., and Van Der Kooy, D. (1986). The development of a Patchy  
691 organization of the rat striatum. *Developmental Brain Research* *27*, 1-10.
- 692 Levesque, M., and Parent, A. (2005). The striatofugal fiber system in primates: a reevaluation of its  
693 organization based on single-axon tracing studies. *Proceedings of the National Academy of Sciences  
694 of the United States of America* *102*, 11888-11893.
- 695 Ma, Y., Hioki, H., Konno, M., Pan, S., Nakamura, H., Nakamura, K.C., Furuta, T., Li, J.L., and  
696 Kaneko, T. (2011). Expression of gap junction protein connexin36 in multiple subtypes of  
697 GABAergic neurons in adult rat somatosensory cortex. *Cerebral cortex* *21*, 2639-2649.
- 698 Menegas, W., Akiti, K., Amo, R., Uchida, N., and Watabe-Uchida, M. (2018). Dopamine neurons  
699 projecting to the posterior striatum reinforce avoidance of threatening stimuli. *Nature neuroscience*  
700 *21*, 1421-1430.
- 701 Menegas, W., Babayan, B.M., Uchida, N., and Watabe-Uchida, M. (2017). Opposite initialization to  
702 novel cues in dopamine signaling in ventral and posterior striatum in mice. *eLife* *6*.
- 703 Menegas, W., Bergan, J.F., Ogawa, S.K., Isogai, Y., Umadevi Venkataraju, K., Osten, P., Uchida, N.,  
704 and Watabe-Uchida, M. (2015). Dopamine neurons projecting to the posterior striatum form an  
705 anatomically distinct subclass. *eLife* *4*, e10032.

## Striatonigral output of caudal striatal neurons

- 706 Miyamoto, Y., Katayama, S., Shigematsu, N., Nishi, A., and Fukuda, T. (2018). Striosome-based  
707 map of the mouse striatum that is conformable to both cortical afferent topography and uneven  
708 distributions of dopamine D1 and D2 receptor-expressing cells. *Brain structure & function*.
- 709 Miyamoto, Y., Nagayoshi, I., Nishi, A., and Fukuda, T. (2019). Three divisions of the mouse caudal  
710 striatum differ in the proportions of dopamine D1 and D2 receptor-expressing cells, distribution of  
711 dopaminergic axons, and composition of cholinergic and GABAergic interneurons. *Brain structure &  
712 function* 224, 2703-2716.
- 713 Moriizumi, T., Leduc-Cross, B., Wu, J.Y., and Hattori, T. (1992). Separate neuronal populations of  
714 the rat substantia nigra pars lateralis with distinct projection sites and transmitter phenotypes.  
715 *Neuroscience* 46, 711-720.
- 716 Mowery, T.M., Penikis, K.B., Young, S.K., Ferrer, C.E., Kotak, V.C., and Sanes, D.H. (2017). The  
717 Sensory Striatum Is Permanently Impaired by Transient Developmental Deprivation. *Cell reports* 19,  
718 2462-2468.
- 719 Nambu, A. (2008). Seven problems on the basal ganglia. *Current opinion in neurobiology* 18, 595-  
720 604.
- 721 Ogata, K., Karube, F., Hirai, Y., Fuyjiyama, F. (2018) The unique distribution of D1 and D2  
722 dopamine receptors in the lateral caudal striatum of rodents. Annual Meeting of Society for  
723 Neuroscience 2018. Abstract number 146.14. In San Diego, November 3-7.
- 724 Paxinos, G., and Franklin, K.B. (2013). *The mouse brain in stereotaxic coordinates.*, 4th edn  
725 (Amsterdam: Elsevier).
- 726 Peak, J., Hart, G., and Balleine, B.W. (2019). From learning to action: the integration of dorsal  
727 striatal input and output pathways in instrumental conditioning. *The European journal of  
728 neuroscience* 49, 658-671.
- 729 Poulin, J.F., Caronia, G., Hofer, C., Cui, Q., Helm, B., Ramakrishnan, C., Chan, C.S., Dombeck,  
730 D.A., Deisseroth, K., and Awatramani, R. (2018). Mapping projections of molecularly defined  
731 dopamine neuron subtypes using intersectional genetic approaches. *Nature neuroscience* 21, 1260-  
732 1271.
- 733 Redgrave, P., Vautrelle, N., and Reynolds, J.N. (2011). Functional properties of the basal ganglia's  
734 re-entrant loop architecture: selection and reinforcement. *Neuroscience* 198, 138-151.
- 735 Rosen, G. D. and R. W. Williams (2001). Complex trait analysis of the mouse striatum: independent  
736 QTLs modulate volume and neuron number. *BMC Neurosci* 2: 5.
- 737 Saint-Cyr, J.A., Ungerleider, L.G., and Desimone, R. (1990). Organization of visual cortical inputs to  
738 the striatum and subsequent outputs to the pallido-nigral complex in the monkey. *The Journal of  
739 comparative neurology* 298, 129-156.
- 740 Selemon, L.D., and Goldman-Rakic, P.S. (1990). Topographic intermingling of striatonigral and  
741 striatopallidal neurons in the rhesus monkey. *The Journal of comparative neurology* 297, 359-376.
- 742 Shepherd, G.M. (2013). Corticostriatal connectivity and its role in disease. *Nature reviews  
743 Neuroscience* 14, 278-291.
- 744 Shipp, S. (2016). The functional logic of corticostriatal connections. *Brain structure & function*.
- 745 Sonntag, M., Englitz, B., Kopp-Scheinpflug, C., and Rubsamen, R. (2009). Early postnatal  
746 development of spontaneous and acoustically evoked discharge activity of principal cells of the  
747 medial nucleus of the trapezoid body: an in vivo study in mice. *The Journal of neuroscience : the  
748 official journal of the Society for Neuroscience* 29, 9510-9520.
- 749 Takada, M. (1992). The lateroposterior thalamic nucleus and substantia nigra pars lateralis: Origin of  
750 dual innervation over the visual system and basal ganglia. *Neuroscience letters* 139, 153-156.

751 Tinterri, A., Menardy, F., Diana, M.A., Lokmane, L., Keita, M., Coulpier, F., Lemoine, S., Mailhes,  
752 C., Mathieu, B., Merchan-Sala, P., *et al.* (2018). Active intermixing of indirect and direct neurons  
753 builds the striatal mosaic. *Nature communications* 9, 4725.  
754 Valjent, E., and Gangarossa, G. (2021). The Tail of the Striatum: From Anatomy to Connectivity and  
755 Function. *Trends in neurosciences* 44, 203-214.  
756 Watabe-Uchida, M., Zhu, L., Ogawa, S.K., Vamanrao, A., and Uchida, N. (2012). Whole-brain  
757 mapping of direct inputs to midbrain dopamine neurons. *Neuron* 74, 858-873.  
758 Xiong, Q., Znamenskiy, P., and Zador, A.M. (2015). Selective corticostriatal plasticity during  
759 acquisition of an auditory discrimination task. *Nature* 521, 348-351.  
760 Yamamoto, S., Monosov, I.E., Yasuda, M., and Hikosaka, O. (2012). What and where information in  
761 the caudate tail guides saccades to visual objects. *The Journal of neuroscience : the official journal of*  
762 *the Society for Neuroscience* 32, 11005-11016.  
763 Yasuda, M., and Hikosaka, O. (2015). Functional territories in primate substantia nigra pars reticulata  
764 separately signaling stable and flexible values. *Journal of neurophysiology* 113, 1681-1696.  
765 Yasui, Y., Nakano, K., Kayahara, T., and Mizuno, N. (1991). Non-dopaminergic projections from the  
766 substantia nigra pars lateralis to the inferior colliculus in the rat. *Brain research* 559, 139-144.  
767 Yeterian, E.H., and Pandya, D.N. (1998). Corticostriatal connections of the superior temporal region  
768 in rhesus monkeys. *The Journal of comparative neurology* 399, 384-402.  
769 Yeterian, E.H., and Van Hoesen, G.W. (1978). Cortico-striate projections in the rhesus monkey: The  
770 organization of certain cortico-caudate connections. *Brain research* 139, 43-63.  
771 Zheng, Q.Y., Johnson, K.R., and Erway, L.C. (1999). Assessment of hearing in 80 inbred strains of  
772 mice by ABR threshold analyses. *Hearing research* 130, 94-107.

773

774

## Striatonigral output of caudal striatal neurons

### 775 10 Tables

#### 776 Table 1 Primary antibodies used in this study

| Antigen              | Host species | dilution | Supplier catalogue #                 | RRID        |
|----------------------|--------------|----------|--------------------------------------|-------------|
| Alexa 488            | rabbit       | 1:2,000  | Thermo Fisher Scientific<br>A10094   | AB_221544   |
| DARPP32              | goat         | 1:500    | Frontier Institute<br>DARPP-Go-A1090 | AB_2571684  |
| dopamine receptor D1 | guinea pig   | 1:500    | Frontier Institute<br>D1R-GP-Af500   | AB_2571595  |
| dopamine receptor D1 | rat          | 1:500    | Sigma Aldrich<br>D2944               | AB_10466396 |
| dopamine receptor D2 | guinea pig   | 1:500    | Frontier Institute<br>D2R-GP-Af500   | AB_2571597  |
| dopamine receptor D2 | rabbit       | 1:500    | Frontier Institute<br>D2R-Rb-Af960   | AB_2571596  |
| dopamine transporter | goat         | 1:1,000  | Frontier Institute<br>DAT-Go-Af980   | AB_2571687  |
| NeuN                 | mouse        | 1:10,000 | Millipore<br>MAB377                  | AB_10048713 |
| NeuN                 | rabbit       | 1:1,000  | Millipore<br>ABN78                   | AB_10807945 |

**Striatonigral output of caudal striatal neurons**

---

|                                        |            |         |                            |             |
|----------------------------------------|------------|---------|----------------------------|-------------|
| parvalbumin                            | guinea pig | 1:4,000 | Synaptic Systems<br>195004 | AB_2156476  |
| Phaseolus Vulgaris<br>Agglutinin (E+L) | goat       | 1:1,000 | Vector<br>AS-2224-1        | AB_10000080 |
| tyrosine hydroxylase                   | mouse      | 1:2,000 | Millipore<br>MAB318        | AB_2313764  |

---

777

## Striatonigral output of caudal striatal neurons

778 **Table 2. Secondary antibodies used in this study.**

| antibody                        | Host species | dilution | Supplier catalogue #                  | RRID        |
|---------------------------------|--------------|----------|---------------------------------------|-------------|
| Anti-goat Alexa Fluor 546       | donkey       | 1:500    | Thermo Fisher Scientific<br>A11056    | AB_10584485 |
| Anti-goat Alexa Fluor 633       | donkey       | 1:500    | Thermo Fisher Scientific<br>A21082    | AB_2535739  |
| Anti-guinea pig Alexa Fluor 488 | donkey       | 1:500    | Jackson Immunoresearch<br>706-545-148 | AB_2341098  |
| Anti-guinea pig Alexa Fluor 555 | goat         | 1:500    | Thermo Fisher Scientific<br>A21435    | AB_2535856  |
| Anti-guinea pig Alexa Fluor 633 | goat         | 1:500    | Thermo Fisher Scientific<br>A21105    | AB_2535757  |
| Anti-mouse Alexa Fluor 488      | donkey       | 1:500    | Thermo Fisher Scientific<br>A21202    | AB_2535788  |
| Anti-mouse Alexa Fluor 546      | donkey       | 1:500    | Thermo Fisher Scientific<br>A10036    | AB_2534012  |
| Anti-mouse Alexa Fluor 635      | goat         | 1:500    | Thermo Fisher Scientific<br>A31575    | AB_2536185  |

### Striatonigral output of caudal striatal neurons

---

|                                |        |       |                                           |            |
|--------------------------------|--------|-------|-------------------------------------------|------------|
| Anti-rabbit-biotin-SP          | donkey | 1:100 | Jackson<br>ImmunoResearch<br>#711-065-152 | AB_2340593 |
| Anti-rabbit Alexa Fluor<br>488 | donkey | 1:500 | Thermo Fisher<br>Scientific<br>A21206     | AB_2535792 |
| Anti-rabbit Alexa Fluor<br>546 | donkey | 1:500 | Thermo Fisher<br>Scientific<br>A10040     | AB_2534016 |
| Anti-rabbit Alexa Fluor<br>635 | goat   | 1:500 | Thermo Fisher<br>Scientific<br>A31577     | AB_2536187 |

---

779

780

## Striatonigral output of caudal striatal neurons

781 **Table 3. Electrophysiological properties of DARPP32 positive neurons in the dorsal striatum,**  
782 **D1R or D2R poor zones.**

|                                        | caudo-dorsal<br>striatum | D1R-poor<br>zone | D2R-poor<br>zone | <i>p</i> value |
|----------------------------------------|--------------------------|------------------|------------------|----------------|
| resting membrane potential<br>(mV)     | -81.1 ± 2.4              | -78.1 ± 3.0      | -78.6 ± 4.18     | 0.23           |
| input resistance (MΩ)                  | 52.7 ± 8.6               | 77.4 ± 20.0      | 85.3 ± 36.4      | 0.07           |
| time constant (ms)                     | 4.33 ± 1.7               | 6.0 ± 2.1        | 6.7 ± 1.94       | 0.197          |
| action potential width (ms)            | 1.57 ± 0.1               | 1.60 ± 0.44      | 1.56 ± 0.25      | 0.98           |
| max action potential frequency<br>(Hz) | 25.0 ± 13.2              | 34.2 ± 11.4      | 34.0 ± 8.0       | 0.42           |
| number of neurons                      | 6                        | 5                | 3                |                |

783

784

785

786

787

788

789



## 790 **11 Figure Legends**

### 791 **Figure 1. Uneven distribution of dopamine receptor D1 (D1R), dopamine receptor D2 (D2R),** 792 **and tyrosine hydroxylase (TH) in the caudal striatum.**

793 (A) Immunofluorescent images against D1R (magenta), D2R (green), and TH (cyan) of the mouse  
794 striatum. Arrowheads indicate the regions with very faint signal as either D1R or D2R. In this paper,  
795 the lateral striatum is subdivided into the rostral (rStr) and caudal striatum (cStr); the dorsal (dStr)  
796 and ventral striatum (vStr); cStr is further divided into the caudo-dorsal (cdStr) and caudoventral  
797 striatum (cvStr), as shown in the rightmost panel. cvStr contains D1R- and D2R-poor zones. The  
798 region surrounding the poor zones is named here as para-poor zone in which D1R and D2R express  
799 nearly uniformly. (B) Quantification of pixel intensity along with a dotted white line. Gray bar  
800 presents the rostral and caudal edges of the striatum. The right panel shows normalized pixel  
801 intensity in a section of a mouse (3.0 mm lateral from the midline). (C) Average pixel intensity (N =  
802 3 mice). Circles indicate individual data. AST, amygdala striatal transition area; Cx, cerebral cortex;  
803 ic, internal capsule; v, ventricle. \*\*\* $p < 0.001$ .

804

### 805 **Figure 2. Uneven distribution of dopamine receptor D1 (D1R) or dopamine receptor D2 (D2R)** 806 **mRNA expressing neurons in the caudal striatum.**

807 (A), (D) Left, Immunofluorescent images against D1R (green) and D2R (magenta). Right, Drd1a-  
808 (A) or Drd2- (D) expressing neurons (blue) with immunostaining against NeuN (brown). (B), (E)  
809 Magnified images of rectangle areas 1-4 in A or D. (C), (F) Proportion of Drd1a- or Drd2-expressing  
810 neurons in rostral (rStr), para-poor zone (ppz), D1R-poor zone (D1p) or D2R-poor zone (D2p). (N =  
811 3 mice for each) (G) Mean NeuN+ cell number in each ROI. (H) Elucidated cell composition in each  
812 striatal area. AST, amygdala striatal transition area; Cx, cerebral cortex; ic, internal capsule; v,  
813 ventricle. \*\* $p < 0.01$ .

814

### 815 **Figure 3. Whole cell recording from the caudal striatum.**

816 (A), An example of the whole cell recorded neurons. The location of the recorded neurons was  
817 confirmed using post-hoc immunofluorescence for dopamine receptor D1 (D1R) (magenta) and  
818 dopamine receptor D2 (D2R) (green). Recorded neurons are shown in cyan. The left neuron (arrow)  
819 is situated in D2R-poor zone, whereas the dendrites of the right neuron (arrowhead) are in D1R-poor  
820 zone. The cell body of the right neurons was not confined in this section. (B) A magnified image of  
821 the left neuron in A. Left, note many spines protruded from the dendrites. Inset shows further  
822 magnified view of the dotted rectangle area. Right, the neuron (asterisk) expressed DARPP32, a  
823 marker of MSNs. (C) Representative traces of membrane voltages responding to depolarized (100  
824 and 500 pA) and hyperpolarized (-100 pA) current pulses. MSNs in the caudo-dorsal striatum (top),  
825 D1R-poor zone (middle), and D2R-poor zone (bottom) possessed similar membrane properties (see  
826 also Table 3).

827

828

## Striatonigral output of caudal striatal neurons

829

### 830 **Figure 4. Uneven distribution of direct pathway neurons in the caudal striatum.**

831 (A) Retrograde labeling of the direct pathway neurons using bulk injection of CTB 555 in substantia  
832 nigra. Note the bulk injection spread broadly; however, globus pallidus (GP), the target of the  
833 indirect pathway, is not invaded. (B) Retrogradely labeled striatal direct pathway neurons are  
834 distributed throughout the striatum, except the dopamine receptor D1 (D1R)-poor zone (D1p). (C)  
835 Magnified images of retrogradely labeled neurons in the rostral striatum, caudal striatum, D1R-poor  
836 zone, and dopamine receptor D2 (D2R)-poor zone. The locations of them were indicated in the  
837 leftmost panel as rectangles 1-4. (D) Density of retrogradely-labeled neurons in each subregion.  
838 D1R-poor zone contained significantly small number of labeled neurons than the other subregions,  
839 whereas larger number of labeled neurons existed in D2R-poor zone. \*  $p < 0.05$ ; \*\* $p < 0.01$ . (E)  
840 Detection of *Drd1a* or *Drd2* mRNA expression using *in situ* hybridization (blue) combined with  
841 immunohistochemistry against CTB (brown; arrowheads). Note CTB-labeled neurons expressed  
842 *Drd1a* (E) but not *Drd2* (F).

843

### 844 **Figure 5. Anterograde axon tracing of the caudal striatum.**

845 (A) An example of biotinylated dextran amine (BDA) injection. The injection site was located in the  
846 dopamine receptor D1 (D1R)-poor zone. (B) Labeled axons from D1R-poor zone in GP, EP, and  
847 internal capsule (ic). Left, BDA labeled axons. Right, NeuN staining. (C) A magnified image of EP.  
848 Faint BDA labeling was observed in EP (arrowheads). More bright axons existed outside of EP  
849 (arrows). (D) Left, Dense BDA labeled axons in SNpl. Right, A magnified image of SNpl. Note  
850 axons were located in SNpl, where tyrosine hydroxylase (TH)-expressing neurons (magenta) did not  
851 exist. (E) Phaseolus Vulgaris Leucoagglutinin (PHAL) injection to the dorsal part of caudal Str  
852 (cdStr), not containing D1R- or dopamine receptor D2 (D2R)-poor zone. (F) cdStr also projected to  
853 SNpl, being relatively dense in the ventral part of SNpl. Amy, amygdala; Cx, cerebral cortex; EP,  
854 entopeduncular nucleus; GP, globus pallidus; ic, internal capsule; Str, striatum; SNpc, substantia  
855 nigra pars compacta; SNpl, substantia nigra pars lateralis; SNpr, substantia nigra pars reticulata.

856

### 857 **Figure 6. The indirect pathway from caudal striatum (cStr).**

858 (A) Biotinylated dextran amine (BDA) injection to poor zones labeled axons in the caudal globus  
859 pallidus (GP), but only few axons in the rostral GP (arrowheads). Arrow indicates descending axons  
860 toward the downstream nuclei. The images were arranged from rostral (the upper left) to caudal (the  
861 lower right). (B) Retrograde tracer, fluorogold, injection to SNpl visualized both cStr neurons and GP  
862 neurons. Dopamine receptor D1 (D1R)- and dopamine receptor D2 (D2R)-poor zones were  
863 confirmed using immunofluorescence. A rectangle area shown in B was magnified in C. (C) Neurons  
864 projecting to SNpl were frequently located in D2R-poor zone (D2p) than in D1R-poor zone (D1p).  
865 Note GP neurons were also frequently labeled in the caudal GP. (D) Fluorogold injection to SNpl,  
866 counter stained with calbindin-D-28k (top). Fluorogold extended to the lateral part of SNpr. PBP,

867 parabrachial pigmented nucleus; SNpl, substantia nigra pars lateralis; SubG, superficial gray layer of  
868 the superior colliculus; VTA, ventral tegmental area.

869

870 **Figure 7. Uneven distribution of dopamine receptor D1 (D1R), dopamine receptor D2 (D2R),**  
871 **and tyrosine hydroxylase (TH) in the caudal striatum existed in mice, rats, and common**  
872 **marmosets.**

873 (A)-(D) Immunofluorescent images against D1R (green), D2R (magenta), and TH (cyan) in the  
874 striatum of rodents. Arrowheads indicate D1R- or D2R-poor zone (D1p or D2p). The distance from  
875 the midline was shown at the lower left corner of the upper panels. (E) Uneven distribution in the  
876 caudate of marmosets. (F) A magnified view of the CDt, including the poor zones. AST, amygdala  
877 striatal transition area; CDh, caudate head; CDt, caudate tail; Cx, cerebral cortex; ic, internal capsule;  
878 v, ventricle.

879

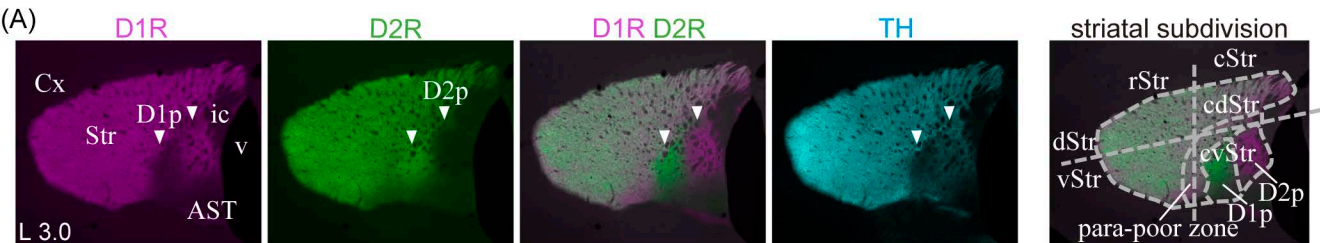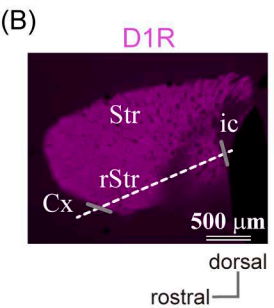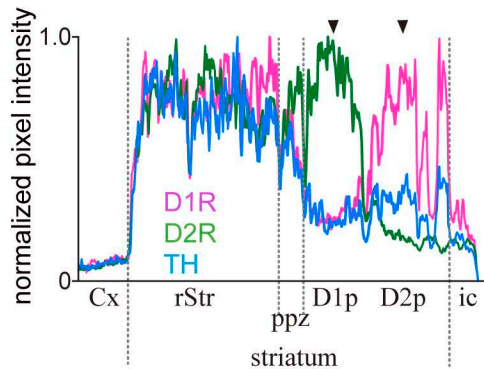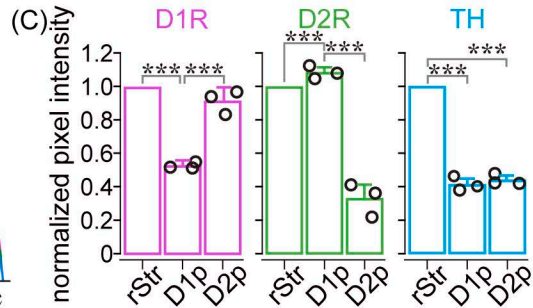

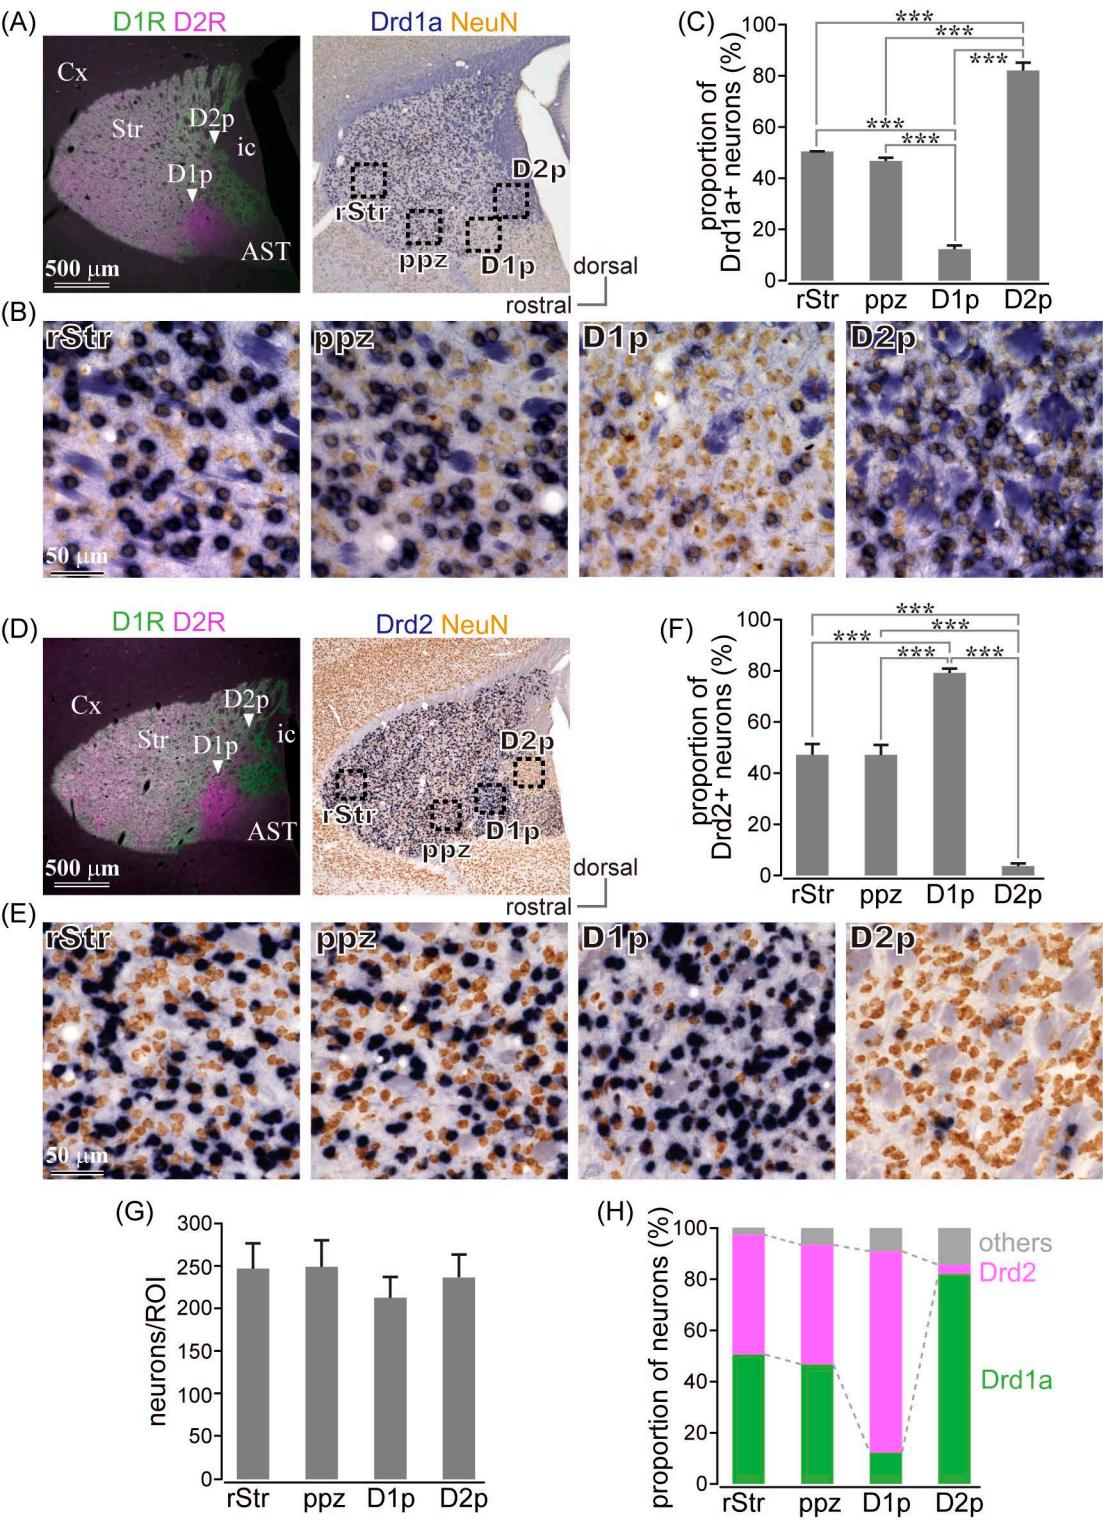

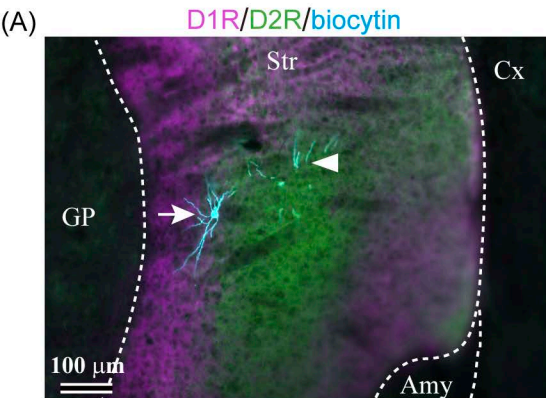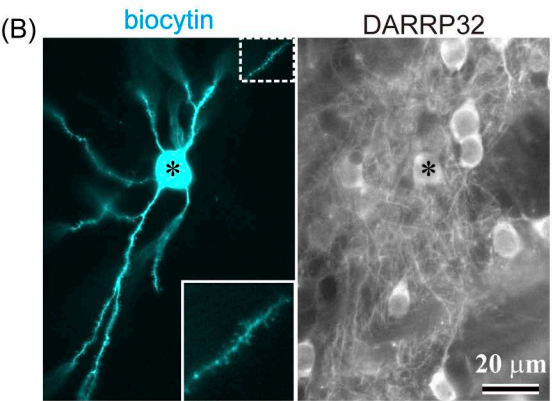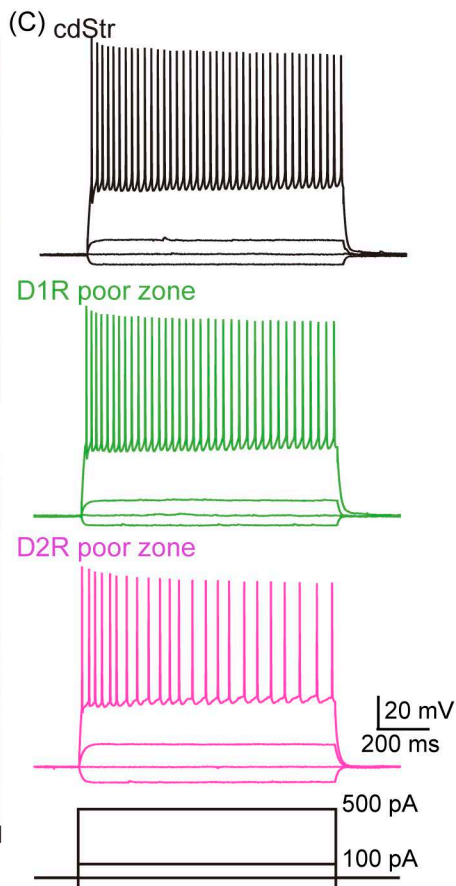

dorsal  
medial

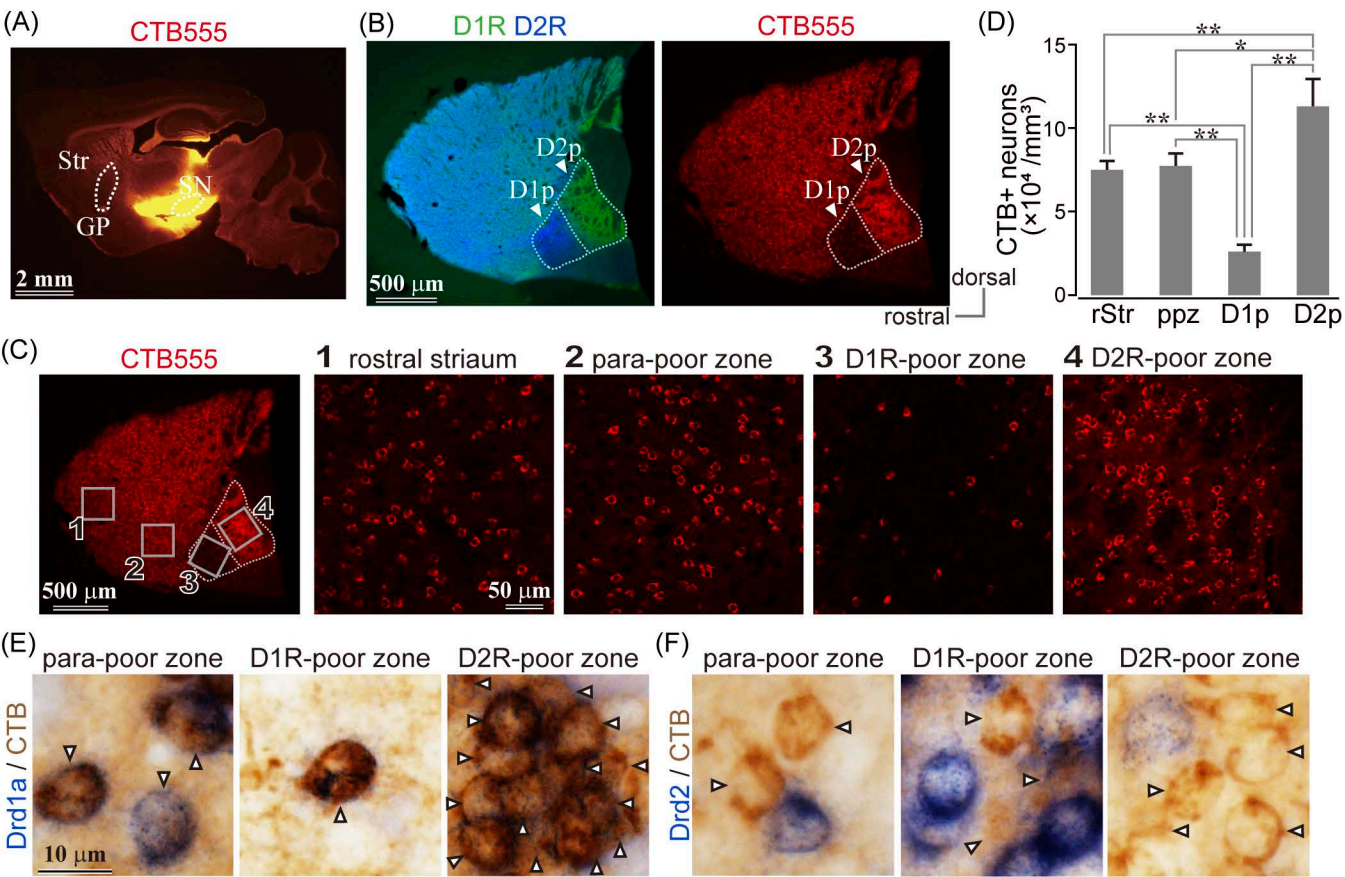

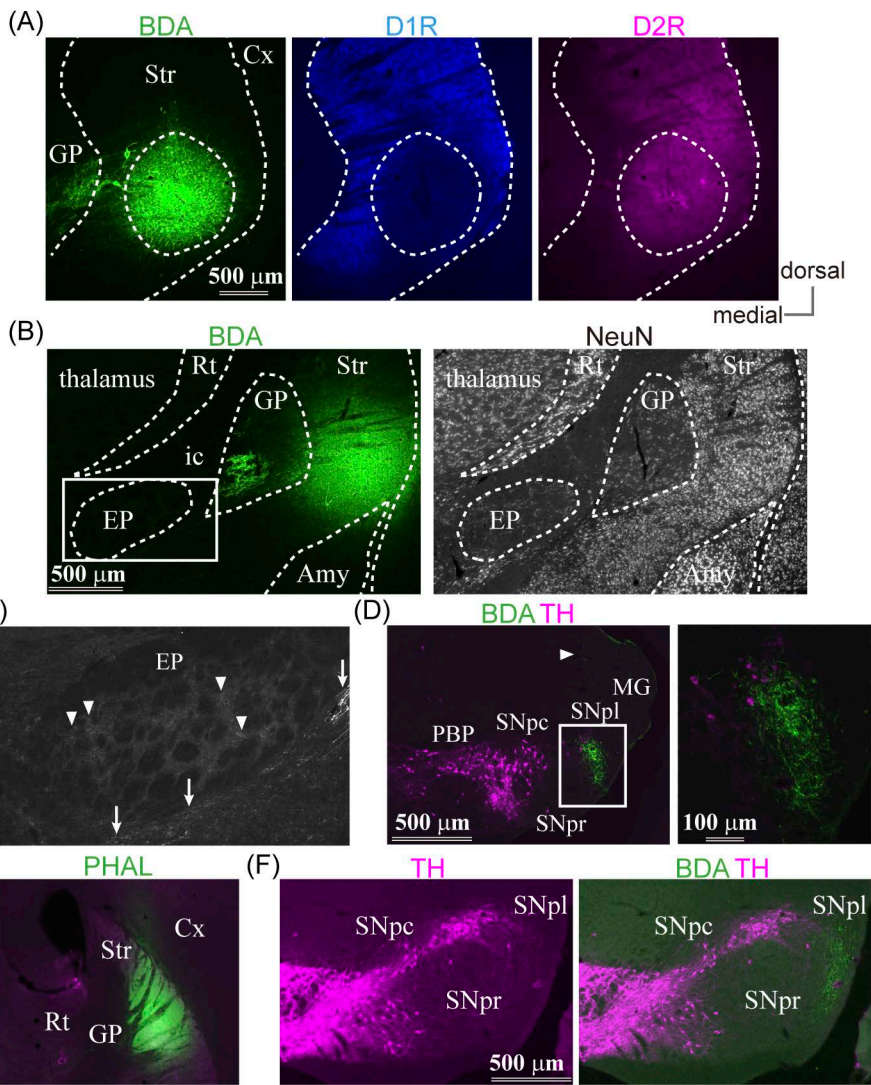



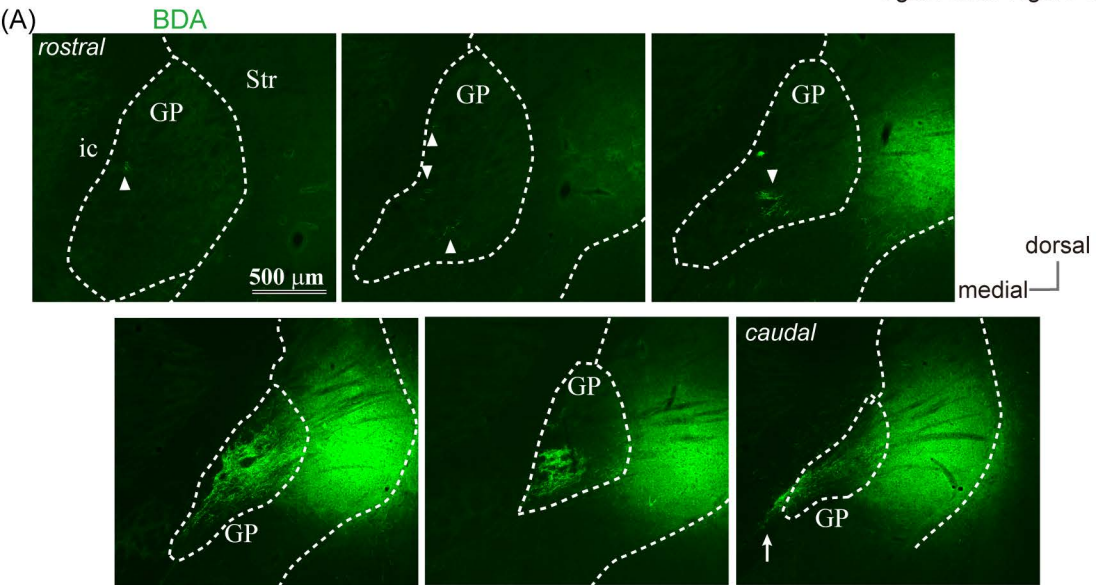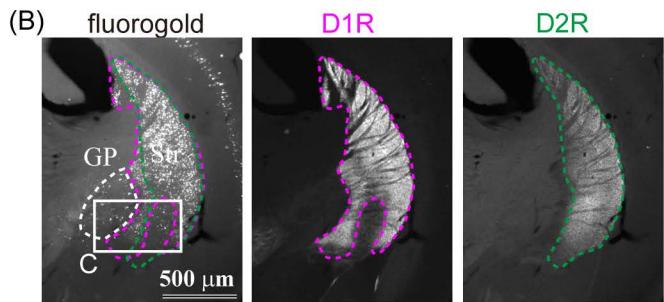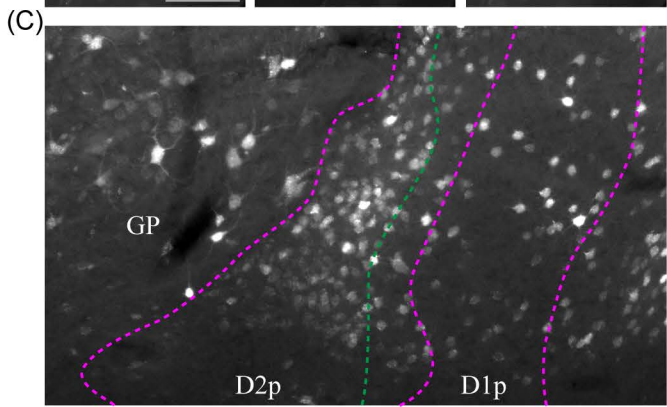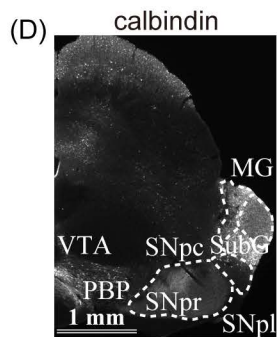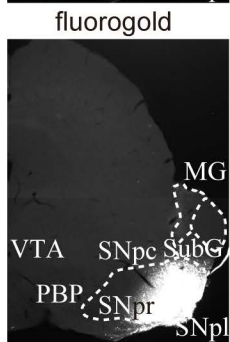

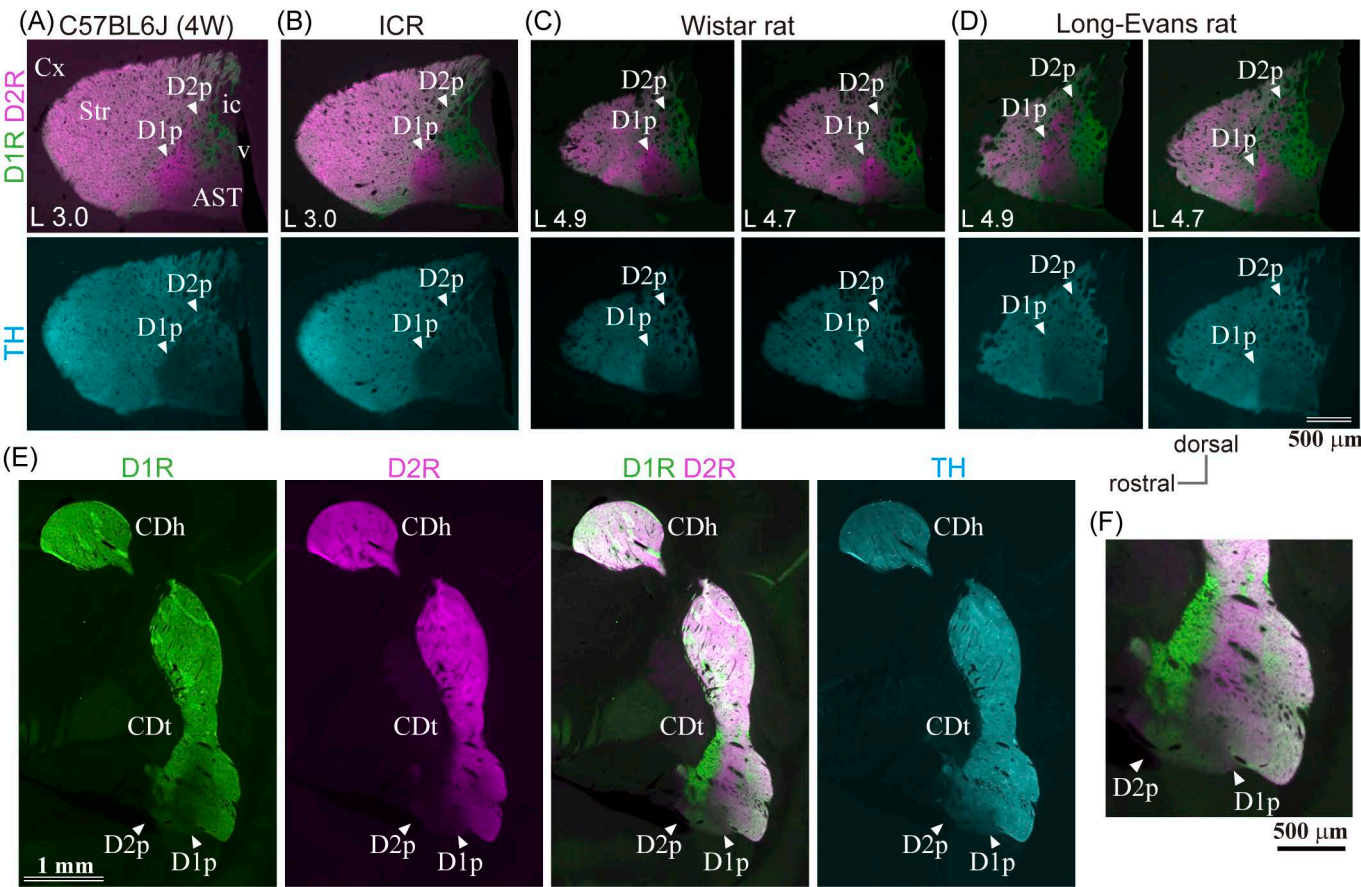

Source: http://biorxiv.org/content/10.1101/2021.11.04.467262v1.full.pdf
